# 1 **Cortical Origin of Theta Error Signals**

2 *Beatriz Herrera<sup>1</sup>, Amirsaman Sajad<sup>2</sup>, Steven P. Errington<sup>3</sup>, Jeffrey D. Schall<sup>4</sup> and Jorge J.*

3 *Riera<sup>1\*</sup>*

4 *<sup>1</sup>Department of Biomedical Engineering, Florida International University, Miami, Florida 33174,*

5 *USA*

6 *<sup>2</sup> Department of Psychology, Vanderbilt Vision Research Center, Center for Integrative &*

7 *Cognitive Neuroscience, Vanderbilt University, Nashville, Tennessee 37203, USA*

8 *<sup>3</sup>Department of Neuroscience, Washington University School of Medicine, St. Louis, Missouri,*

9 *63110, USA*

10 *<sup>4</sup>Centre for Vision Research, Vision: Science to Applications Program, Departments of Biology*

11 *and Psychology, York University, Toronto, Ontario M3J 1P3, Canada*

12 **Corresponding Authors:** \* Jorge J. Riera ([jrieradi@fiu.edu](mailto:jrieradi@fiu.edu))

13 **Abstract**

14 A multi-scale approach elucidated the origin of the error-related-negativity (ERN), with its  
15 associated theta-rhythm, and the post-error-positivity (Pe) in macaque supplementary eye field  
16 (SEF). Using biophysical modeling, synaptic inputs to layer-3 (L3) and layer-5 (L5) pyramidal  
17 cells (PCs) were optimized to account for error-related modulation and inter-spike intervals. The  
18 intrinsic dynamics of dendrites in L5 but not L3 PCs generate theta rhythmicity with random  
19 phase. Saccades synchronized the phase of this theta-rhythm, which was magnified on errors.  
20 Contributions from L5 PCs to the laminar current source density (CSD) observed in SEF were  
21 negligible. The CSD derived from L3 PCs could not explain the observed association between  
22 their error-related spiking modulation and scalp-EEG. Laminar CSD comprises multipolar  
23 components, with dipoles explaining ERN features, and quadrupoles reproducing those for Pe.  
24 The presence of monopoles indicates diffuse activation. These results provide the most  
25 advanced explanation of the cellular mechanisms generating the ERN.

26 **Keywords:** biophysical models, CSD, ERN, multiscale analysis, theta rhythm

27

## 28 **Introduction**

29 Cognitive control involves the suppression of automatic or impulsive actions and error  
30 monitoring for successful goal-directed behavior. Disorders such as attention-deficit  
31 hyperactivity disorder (ADHD)(Armstrong and Munoz 2003; Hanisch et al. 2006), obsessive-  
32 compulsive disorder (OCD) (Penadés et al. 2007), and schizophrenia (Donohoe et al. 2006),  
33 involve insufficient cognitive control (Aron et al. 2003). Human and macaque  
34 electrophysiological studies have characterized the scalp potentials associated with error  
35 monitoring (Gehring et al. 2012), the error-related negativity (ERN) associated with prominent  
36 midfrontal theta oscillations (Cavanagh and Frank 2014; Cohen 2014). Although the ERN is  
37 known to originate from medial frontal areas (Stuphorn et al. 2000; Garavan et al. 2003; Ito et al.  
38 2003; Emeric et al. 2008, 2010; Gehring et al. 2012; Scangos et al. 2013; Sajad et al. 2019; Fu  
39 et al. 2023) , the cellular-level mechanisms producing these signals and their involvement in  
40 midfrontal theta generation are unknown. A better understanding of the mechanisms of error  
41 monitoring at the microcircuit level will provide more insights into the underlying intricacies of  
42 neurological disorders and hence aid their diagnosis and treatment by mechanistically defining  
43 ERN biomarkers.

44 Performance evaluation indexed by the ERN can be investigated with the stop-signal task  
45 (Verbruggen and Logan 2009). Specific neurons in the supplementary eye field (SEF) signal  
46 gaze errors, causing an imprint in the local field potential (LFP) (Stuphorn et al. 2000; Emeric et  
47 al. 2010). Recently, we have used linear electrode arrays to characterize the laminar  
48 organization of neural processing in SEF (Sajad et al. 2019, 2022). We found that most error-  
49 related neurons have broad spikes, consistent with pyramidal cells (PCs), and that the variability  
50 in spiking of neurons in layers 2 and 3, but not in layers 5 and 6, is statistically associated with  
51 the variability of the ERN. It remains unclear whether these error-related PCs contribute directly

52 to the LFP in SEF or cause large circuitual activation that are then visible in LFP. What types of  
53 brain source components in SEF generate the ERN, and potentially Pe, is another unsolved  
54 question. Also, previous studies have suggested a microcircuit origin for the theta oscillation in  
55 midfrontal cortical areas (Cohen 2014), involving positive feedback between L3 and L5 PCs as  
56 well as an inhibitory close loop by Martinotti cells. Mechanisms linking error-related PCs to theta  
57 oscillation are still elusive. Current source density (CSD) and time-frequency analysis methods  
58 offer insights into layer-specific contributions but cannot resolve the distinct neuronal  
59 populations. In our opinion, biophysically detailed modeling of the activity of L3 and L5 PCs in  
60 SEF, combined with mesoscopic brain source models, is required to resolve such cell-specific  
61 mechanisms from multiscale electrophysiological data.

62 Here, we combined detailed biophysical modeling of individual PCs with neural data recorded in  
63 SEF from two macaque monkeys performing the stop-signal task (Godlove et al. 2014; Sajad et  
64 al. 2019). The spatio-temporal pattern of excitatory (NMDA and AMPA) pre-synaptic inputs were  
65 optimized in models of L3 and L5 PCs to replicate observed error-related modulation and inter-  
66 spike interval profiles before and during the testing trials. The LFP across cortical layers derived  
67 from the parameterized model of L5 but not of L3 PCs produced a significant increase in theta  
68 power on error versus correct trials. Although peaking during the ERN, the current density  
69 derived from the simulated PCs provided a negligible contribution to both the CSD in SEF and  
70 the scalp-ERN. The observed current density included a well-defined dipolar component  
71 explaining the ERN and a significant quadrupolar contribution to the Pe component. Overall,  
72 these results suggest localized activation in SEF underlying the ERN, but the Pe component  
73 might be more diffuse in SEF or perhaps involve other cortical regions. The origin of a large  
74 monopolar source found in SEF is yet to be explained. By translating across scales, these  
75 findings offer unprecedented insights into the mechanisms of cognitive control and the origin of  
76 the ERN.



## 77 **Materials and Methods**

### 78 **Experimental Model and Subject Details**

79 Data were collected from one male bonnet macaque (Eu, *Macaca radiata*, ~8.8 kg) and one  
80 female rhesus macaque (X, *Macaca Mulatta*, ~6.0 kg) performing a saccade countermanding  
81 stop-signal task (Hanes and Schall 1995; Godlove et al. 2014). Monkeys were cared for in  
82 accordance with the United States Department of Agriculture and Public Health Service Policies  
83 on Human Care and Use of Laboratory Animals. All procedures were performed with  
84 supervision and approval from the Vanderbilt Institutional Animal Care and Use Committee.

### 85 **Animal Care and Surgical Procedures**

86 Anatomic images were acquired with a Philips Intera Achieva 3 Tesla scanner using SENSE  
87 Flex-S surface coils placed above and below the head. T1-weighted gradient-echo structural  
88 images were obtained with a 3D turbo field echo anatomical sequence (TR = 8.729 ms; 130  
89 slices, 0.70 mm thickness). Anatomical images guided the placement of Cilux recording  
90 chambers in the correct area. Chambers were implanted normal to the cortex (Monkey Eu: 17°;  
91 777 Monkey X: 9°; relative to stereotaxic vertical) centered on the midline, 30mm (Monkey Eu)  
92 and 778 28mm (Monkey X) anterior to the interaural line. Surgical procedures have been  
93 previously described (Godlove, Garr, et al. 2011).

### 94 **Saccade Countermanding Stop-Signal Task**

95 Monkeys performed a stop-signal saccade countermanding task (monkeys Eu and X) (Fig. 1A).  
96 All trials started with the presentation of a central fixation spot in the form of a square. Monkeys  
97 were required to hold fixation for a variable interval after which the center of the square was  
98 extinguished. Simultaneously, a peripheral target at either the right or left of the fixation spot  
99 was presented. On no-stop-signal trials, monkeys were required to generate a saccade to a

100 peripheral target, whereupon after  $600 \pm 0$  ms, a high-pitched auditory feedback tone was  
101 delivered, and  $600 \pm 0$  ms later, fluid reward was provided. On stop-signal trials, following the  
102 target presentation and after a variable stop-signal delay (SSD), the fixation spot was re-  
103 illuminated instructing the monkey to inhibit the planned saccade. In the trials where the monkey  
104 successfully canceled the saccade to the peripheral target, the same high-pitch tone was  
105 presented after a  $1,500 \pm 0$  ms hold time followed, after  $600 \pm 0$  ms, by fluid reward. SSD was  
106 adjusted such that monkeys successfully canceled the saccade in ~50% of the trials.  
107 Noncanceled errors occurred when monkeys generated a saccade despite the appearance of  
108 stop-signal. In these trials, a low-pitch tone was presented  $600 \pm 0$  ms after the saccade and no  
109 fluid reward was delivered.

#### 110 **Cortical mapping and electrode placement**

111 Chambers implanted over the medial frontal cortex were mapped using tungsten  
112 microelectrodes (2-4 M $\Omega$ , FHC, Bowdoin, ME) to apply 200ms trains of biphasic micro-  
113 stimulation (333 Hz, 200  $\mu$ s pulse width). The SEF was identified as the area from which  
114 saccades could be elicited using  $< 50 \mu$ A of current (Schlag and Schlag-Rey 1987; Schall  
115 1991). In both monkeys, the SEF chamber was placed over the left hemisphere. The  
116 dorsomedial location of the SEF makes it readily accessible for linear electrode array recordings  
117 across all cortical layers. A total of five penetrations were made into the cortex—two in monkey  
118 Eu, and three in monkey X. Three of these penetration locations were perpendicular to the  
119 cortex. In monkey Eu, the perpendicular penetrations sampled activity at site P1, located 5 mm  
120 lateral to the midline and 31 mm anterior to the interaural line. In monkey X, the perpendicular  
121 penetrations sampled activity at sites P2 and P3, located 5 mm lateral to the midline and 29 and  
122 30 mm anterior to the interaural line, respectively. However, during the mapping of the bank of  
123 the cortical medial wall, we noted both monkeys had chambers placed ~1 mm to the right

124 respective to the midline of the brain. This was confirmed through co-registered CT/MRI data.  
125 Subsequently, the stereotaxic estimate placed the electrodes at 4 mm lateral to the cortical  
126 midline opposed to the skull-based stereotaxic midline.

### 127 **Spiking activity and local field potential recordings**

128 During recordings, monkeys sat in enclosed primate chairs with heads restrained 45 cm from a  
129 CRT monitor (Dell P1130, background luminance of  $0.10 \text{ cd/m}^2$ , 70 Hz) subtending  $46^\circ \times 36^\circ$  of  
130 visual angle. Daily recording protocols were consistent across monkeys and sessions. After  
131 advancing the electrode array to the desired depth, electrodes were allowed to settle for three to  
132 four hours to ensure stable recordings.

133 Spiking activity and local field potentials (LFPs) were recorded from SEF using a 24-channel U  
134 probe (Plexon, Dallas, TX) with  $150 \mu\text{m}$  inter-electrode distance. The U probes had 100 mm  
135 probe length with 30 mm reinforced tubing,  $210 \mu\text{m}$  probe diameter,  $30^\circ$  tip angle,  $500 \mu\text{m}$  to  
136 first contact. Contacts were referenced to the probe shaft and grounded to the metal headpost.  
137 All data were streamed to a data acquisition system (MAP, Plexon, Dallas, TX). Time stamps of  
138 trial events were recorded at 500 Hz. Eye position data were streamed to the Plexon computer  
139 at 1 kHz using an EyeLink 1000 infrared eye-tracking system (SR Research, Kanata, Ontario,  
140 Canada). LFP and spiking data were processed with unity-gain high-input impedance head  
141 stages (HST/32o25-36P-TR, Plexon).

142 LFP data were bandpass filtered at 0.2–300 Hz and amplified 1000 times with a Plexon  
143 preamplifier and digitized at 1 kHz. Neuronal spiking data were bandpass filtered between 100  
144 Hz and 8 kHz and amplified 1000 times with a Plexon preamplifier, filtered in software with a  
145 250 Hz high-pass filter, and amplified an additional 32,000 times. Waveforms were digitized  
146 from  $-200$  to  $1200 \mu\text{s}$  relative to threshold crossings at 40 kHz. Thresholds were typically set at  
147 3.5 standard deviations from the mean. Single units were sorted online using a software window

148 discriminator and refined offline using principal components analysis implemented in Plexon  
149 offline sorter.

### 150 **Cortical depth and layer assignment**

151 Depth alignment and laminar assignment were performed across sessions as described in  
152 Godlove et al. (2014). Briefly, flashed visual stimulation was delivered to the monkeys between  
153 sessions. Recording sessions were aligned relative to the initial visually evoked sink observed  
154 on the laminar CSD using an automated depth alignment algorithm. The procedure minimized  
155 the differences between the averaged visually evoked CSD across sessions in the 50-100 ms  
156 window after the visual stimulus onset. The minimum of the initial visually evoked sink, located  
157 in L3, was set as depth zero. Based on this convention, the algorithm identified depths 0.21,  
158 0.36, and 1.02 mm as L1 to L2/3, L3 to L5, and L5 to L6 laminar boundaries, respectively.

### 159 **Analysis of spiking activity**

160 Single unit spike rate was estimated on a trial-by-trial basis by calculating the peri-stimulus time  
161 histogram (PSTH) of recorded spike trains and convolving them with a Gaussian of zero mean  
162 and 10 ms standard deviation. We utilized a bin size of 10 ms to calculate the PSTHs. Trials  
163 were defined from -500 ms to 1000 ms relative to saccade initiation time. The average  
164 instantaneous spike rate for each recorded unit was obtained by taking the mean across trials.  
165 As previously described by Sajad et al. (2019), error neurons were identified as units showing  
166 periods of significant difference between their spiking activity on error and correct trials (referred  
167 to as difference function) that exceeded 2 standard deviations above a baseline difference  
168 measured during the 300 ms period before target onset and persisted for at least 100 ms, or for  
169 50 ms if the difference exceeded 6 standard deviations above the baseline. Only saccades from  
170 error and correct trials with similar reaction time (RT) (within 10 ms) and direction were used for

171 comparison. We excluded from the analysis all error trials in which the stop-signal appeared  
172 after saccade initiation time. Trials with unstable spiking activity were also excluded from the  
173 analyses.

174 We study the spiking profiles of error neurons using their ISI distribution in the pre-target and  
175 post-saccade periods. ISI distributions were calculated using the function `ft_spike_isi()` from the  
176 FieldTrip toolbox (Oostenveld et al. 2011) with a bin size of 2 ms. For calculating the pre-target  
177 ISI distributions, we considered all spikes fired before the target presentation until the beginning  
178 of the trial. We calculated the pre-target ISI distribution for error and correct trials individually but  
179 found no differences. Thus, we combined all trial types for calculating the final pre-target ISI  
180 distribution reported in Fig. 2E and Fig. 3E. We obtained the post-saccade ISI distributions  
181 considering all spikes fired after saccade initiation and before the delivery of the feedback tone.  
182 ISI distributions were normalized by the total number of trials before calculating the averaged ISI  
183 distribution across neurons.

184 We used a combination of custom-written MATLAB functions (MATLAB 2021b, MathWorks) and  
185 the FieldTrip toolbox for analyzing the analyses (Oostenveld et al. 2011).

### 186 **Analysis of local field potentials**

187 All analyses were done in MATLAB using custom-written scripts and the FieldTrip toolbox  
188 (Oostenveld et al. 2011).

### 189 ***ERP and CSD analysis***

190 LFPs were epoched from -500ms to 1,000ms relative to the saccade initiation time, and low-  
191 pass filtered at 100 Hz using a two-pass fourth-order Butterworth filter. Recorded trials were  
192 separated into correct no-stop-signal and error non-canceled trials. ERPs were time-locked to

193 saccade initiation and baseline corrected to the 200 ms interval preceding the target onset  
194 (Godlove et al. 2014).

195 We computed the CSD from ERPs using the spline-iCSD method (Pettersen et al. 2006) as  
196 implemented in the CSDplotter toolbox (<https://github.com/espenhgn/CSDplotter>) with custom  
197 MATLAB (R2021b, The MathWorks) scripts (Herrera et al. 2022).

### 198 ***Frequency domain analysis***

199 Time-varying laminar power maps per frequency band were calculated from the LFPs using the  
200 Hilbert transform. First, we bandpass filtered the raw LFPs before selecting the trials between 4-  
201 8 Hz ( $\theta$  band), 9-14 Hz (alpha band), 15-29 Hz (beta band), and 30-80 Hz (gamma band),  
202 respectively. We constructed 4 Equiripple Bandpass FIR filters using Parks-McClellan optimal  
203 FIR filter design, as implemented in `firpm()` function from MATLAB's Signal Processing Toolbox  
204 6.14. The optimal filter orders were determined using `firpmord()` function. Supplemental Fig.  
205 S1A shows the magnitude response function of the designed filters. Second, we epoched the  
206 filtered LFPs from -500ms to 1,000ms relative to the saccade initiation time. Third, we  
207 calculated the Hilbert transform of the filtered LFPs per electrode contact for each trial. Next, we  
208 extracted the time-varying power estimates per electrode contact by taking the squared  
209 magnitude of the Hilbert transform of the filtered LFPs and then, baseline corrected them to the  
210 mean power in the 200 ms interval preceding the target onset. The final time-varying laminar  
211 LFP power maps were obtained by taking the mean across the single trial laminar power  
212 estimates. Supplemental Fig. S1A illustrates the filtering and epoching procedures and  
213 Supplemental Fig. S1B the trial-level processing steps followed to calculate the single trial  
214 laminar LFP power estimates.

## 215 **Biophysical modeling**

### 216 ***Pyramidal Cell Models***

217 We simulated the spiking activity of L3 PCs using the previously described model by Eyal et al.  
218 (2018) (ModelDB, accession #238347, 2013\_03\_06\_cell03\_789\_H41\_03, active model  
219 cell0603\_08\_model\_602). L5 PCs were modeled as previously described in Hay et al. (2011)  
220 (ModelDB, accession #139653, “cell #1”), incorporating the modifications of voltage-gated  
221 calcium channel densities as in Shai et al. (2015) and Ih channel density distribution as in  
222 Labarrera et al. (2018) (Leleo and Segev 2021). Using this modified version of Hay et al. (Leleo  
223 and Segev 2021) model allowed us to decrease the bursting activity of the neuron and obtain  
224 ISI distributions closer to those observed in the experimental data.

### 225 ***Synaptic Inputs***

226 For all simulations, unless otherwise specified, we considered modeled neurons that received  
227 excitatory NMDA and AMPA synaptic inputs randomly distributed along their dendrites in  
228 clusters of 20 synapses within  $20\mu\text{m}$  (Yadav et al. 2012; Kastellakis et al. 2015). The location of  
229 the synapses varied for each simulated neuron and trial. The number of NMDA and AMPA  
230 synapses for each neuron type was set based on the approximate density of NMDA and AMPA  
231 receptors in SEF (area F7d) of macaque monkeys reported in the literature (Geyer et al. 1998;  
232 Rapan et al. 2021). We considered the total number of NMDA synapses in the oblique and  
233 basal dendrites of L5 PCs (890 synapses) as a reference and determined the number of NMDA  
234 synapses in the distal apical dendrites of these neurons based on the relative density of NMDA  
235 receptors across the neuron. The total number of AMPA synapses across a simulated L5 PC  
236 was calculated based on the ratio of NMDA and AMPA synapses (AMPA-NMDA-ratio: 0.1045)  
237 (Rapan et al. 2021). Similarly, we estimated the number of AMPA and NMDA synapses on  
238 simulated L3 PCs relative to the set number of NMDA synapses on simulated L5 PCs

239 considering the ratio of L3 to L5-distal-apical AMPA (0.59) (Datta et al. 2015). In summary, we  
240 considered a total of 1080, 600, and 1200 NMDA synapses along the basal, oblique, and distal  
241 apical dendrites of L3 PCs, and 100, 60, and 120 AMPA synapses, respectively. For L5 PCs,  
242 we considered 580 and 444 basal and distal apical dendritic NMDA synapses, and 60 and 132  
243 AMPA synapses, respectively.

244 AMPA-based synaptic currents were modeled as (Mäki-Marttunen et al. 2018):  $I_{AMPA} =$   
245  $w_{AMPA} g_{AMPA}(t)(E_{AMPA} - V)$ ; with  $g_{AMPA}(t) = (B_{AMPA} - A_{AMPA})$ , and  $E_{AMPA} = 0\text{mV}$ . NMDA-based  
246 synaptic currents were modeled according to the standard formalism(Jahr and Stevens 1990):  
247  $I_{NMDA} = -g_{NMDA}(t)w_{NMDA}(V - E_{NMDA})$ ,  $g_{NMDA}(t) = (B_{NMDA} - A_{NMDA})f_{Mg}(V)$ ;  $E_{NMDA} = E_{AMPA} =$   
248  $0\text{mV}$ ; with  $f_{Mg}(V) = 1/(1 + 0.264 \exp(-0.062V))$  representing the voltage-dependent  
249 magnesium (Mg) block. The equations for  $A_i$  and  $B_i$  are given by (Mäki-Marttunen et al. 2018):  
250  $\frac{dx_i}{dt} = -\frac{x_i}{\tau_x} + \tilde{g}_i \cdot \delta(t - t_i)$  with  $x = \{A, B\}$  and  $i = \{AMPA, NMDA\}$ .  $\tau_{A,AMPA} = 0.2\text{ ms}$  and  $\tau_{B,AMPA} =$   
251  $1.7\text{ ms}$  (Mäki-Marttunen et al. 2018), and  $\tau_{A,NMDA} = 2\text{ ms}$  and  $\tau_{B,NMDA} = 100\text{ ms}$ (Jahr and  
252 Stevens 1990). For each synapse model,  $V$  represents the post-synaptic membrane potential,  
253 and  $t_i$  the onset time of the presynaptic spike.  $E_i$ ,  $g_i$  and  $\tilde{g}_i$  are the synaptic reversal potential,  
254 the gating variable representing the proportion of open channels, and the maximum synaptic  
255 conductance, respectively.

### 256 ***Estimation of Synaptic Inputs Activation Profiles from Observed Data***

257 We simulated background excitatory inputs coming to L3 and L5 PCs by randomly activating the  
258 excitatory synapses on the PC models following a Poisson distribution with a fixed mean. We  
259 manually varied the mean of the Poisson process to replicate the observed ISI distribution and  
260 spiking activity of recorded L3 and L5 putative error PCs during the pre-target period. Because  
261 recorded error neurons from these layers showed large variability in their ISI interval



262 distributions, we did not consider neurons with outlier ISI distributions when obtaining the  
263 averaged ISI distribution and spike rate relative to saccade onset. We considered 10 L3 and 5  
264 L5 putative error PCs in the final analyses to constrain the neuronal models.

265 We modeled time-locked saccade-related inputs as spike generators with a predefined temporal  
266 profile relative to the saccade onset time. On a trial-by-trial basis, presynaptic spike times were  
267 chosen from a skew-normal distribution (Jones et al. 2007). The number of pre-synaptic  
268 temporal profiles and their location along the neuron, as well as their skewness, mean, and  
269 standard deviation, were estimated to reproduce the spiking activity and ISI distribution of  
270 recorded L3 and L5 putative error PCs relative to saccade onset.

271 To account for the variable target times and RT observed in the experimental data, we  
272 calculated the distribution of target times and saccade times from the experimental data and  
273 used these distributions to randomly generate target and saccade onset times for each  
274 simulated trial.

### 275 ***Analysis of simulated spiking activity***

276 Simulated ISI distributions and spike rates were calculated following the same methodology as  
277 for the experimental data. To mimic some of the variability observed in the recorded neurons,  
278 we simulated the same number of selected putative L3 (N=10) and L5 (N=5) error PCs and a  
279 total of 106 trials, the mean number of trials across sessions in the experimental recordings. In  
280 each of these simulations, we randomly varied the location of the pre-synaptic inputs on the  
281 modeled neurons, while keeping constant the total number of NMDA and AMPA synapses.

282 Spike times were obtained from the simulated somatic membrane potentials using the  
283 `peak_detection()` function of the Elephant Python package (Denker et al. 2018) with a threshold  
284 of 0 mV. To calculate the post-saccade ISI distributions of simulated neurons, we randomly  
285 generated the delivery time of the feedback tone for each simulated trial from the experimental

286 distribution of tone times. As for the experimental data, we excluded all spikes fired after the  
287 tone.

### 288 ***Analysis of simulated field potentials***

289 To study the contribution of L3 and L5 error PCs, we simulated the extracellular field potentials  
290 evoked by a population of 625 L3 and 1,000 L5 error PCs under the estimated synaptic inputs.  
291 We chose the number of neurons considering the ratio of L3 and L5 PCs in SEF (area F7,  
292  $\sim >42,500$  neurons per  $\text{mm}^3$ ) (Beul and Hilgetag 2019), the approximate proportion of error  
293 neurons in SEF based on all recorded neurons (18 and 16 percent of the neurons recorded from  
294 these layers were error neurons, and  $\sim 90\%$  were putative PCs) and the computational costs.  
295 We decided to simulate a maximum of 1,000 neurons and scale the magnitude of the laminar  
296 CSD obtained from the simulated LFPs. We estimated that a cylindrical cortical column of 3 mm  
297 diameter located in SEF would have at least 18,250 L3 and 29,200 L5 error PCs (Beul and  
298 Hilgetag 2019), yielding a ratio of L5-to-L3 error PCs of 1.6. Specifically, we calculated the LFP  
299 produced by the activity of the neurons at 16 equally spaced vertically aligned points located at  
300 the center of a cylindrical cortical column of 3 mm diameter. As in the experiments, the inter-  
301 electrode distance was  $150 \mu\text{m}$ . The soma of the neurons was randomly located within the  
302 cylindrical cortical column in their associated cortical layers, with height corresponding to the  
303 vertical extent in area SEF of lower L3 ( $700\text{-}1100 \mu\text{m}$  below the pia matter) and L5 ( $1125\text{-}1750$   
304  $\mu\text{m}$ ). LFPs were calculated from the transmembrane currents using the *point-source*  
305 *approximation* in LFPy (Lindén et al. 2014; Hagen et al. 2018). The *point-source approximation*  
306 assumes that each transmembrane current can be represented as a discrete point in space, the  
307 center of each neuronal compartment. Considering the extracellular medium is homogeneous  
308 and isotropic with an extracellular conductivity  $\sigma_b$ , the extracellular potential  $\Phi(z_e, t)$  at the  
309 electrode  $z_e$  can be calculated by

$$\Phi(z_e, t) = \frac{1}{4\pi\sigma_b} \sum_{p=1}^{N_n} \sum_{i=1}^{N_p} \sum_{c=1}^{N_c^i} \frac{I_{p,c}^i(t)}{|\vec{r}_e - \vec{r}_{p,c}^i|} \quad (1)$$

311 where  $N_n$ ,  $N_p$ , and  $N_c^i$  denote the total number of distinct neuron populations, the number of  
312 neurons in the  $p$ -th population and the number of compartments in the  $i$ -th neuron of the  $p$ -th  
313 population, respectively.  $\vec{r}_{p,c}^i = \{x_{p,c}^i, y_{p,c}^i, z_{p,c}^i\}$  indicates the coordinates of the  $c$ -th compartment  
314 of the  $i$ -th neuron in the  $p$ -th population and  $\vec{r}_e = (x_e = 0, y_e = 0, z_e)$  the coordinates of the  
315 electrodes.  $I_{p,c}^i(t)$  is the transmembrane current of the  $c$ -th compartment of the  $i$ -th neuron in  
316 the  $p$ -th population.

317 The LFP was obtained by low pass filtering the extracellular potentials ( $\Phi(\vec{r}_e, t)$ ) at 100 Hz. LFPs  
318 were baseline corrected to the 200 ms interval preceding the target onset. The CSD patterns of  
319 the synthetic data sets were calculated using the spline-iCSD method (Pettersen et al. 2006)  
320 with the custom MATLAB (R2021b, The MathWorks) scripts used for the experimental data  
321 (Herrera et al. 2022). We obtained the time-varying laminar power maps per frequency band  
322 from the simulated LFPs using the same analysis pipeline as for the experimental data  
323 (Supplementary Fig. S1).

## 324 **Simulations**

325 All biophysical simulations were performed in Python using NEURON 8.0 (Hines et al. 2009)  
326 and LFPy 2.2 (Hagen et al. 2018). Data analysis was performed in MATLAB (R2021b, The  
327 MathWorks).

## 328 **EEG Forward Model**

329 To calculate the EEG potential  $V_e(r_e, t)$  at the position of the electrodes  $r_e$  (Fig. 7A), we  
330 modeled the monkey's head as an isotropic and piecewise homogenous volume conductor  
331 comprised of the scalp, inner and outer skull, and the cortex surface. For both the experimental

332 and simulated data, we utilized a volume conductor model of the monkey's head constructed in  
 333 Brainstorm (Tadel et al. 2011) from the symmetric surfaces provided in the NIMH Macaque  
 334 Template version 2.0 (Jung et al. 2021) (Fig. 7A). The scalp, skull, and brain conductivities were  
 335 set as 0.43, 0.0063, and 0.33 S/m (Lee et al. 2015), respectively. In the experimental  
 336 recordings, only electrodes FpFz, Cz, F3, and F4 were used. Thus, we considered the same  
 337 electrode positions for our EEG calculations. We obtained the position of the electrodes on the  
 338 scalp surface of the NIMH Macaque Template using the algorithm from Giacometti et al. (2014)  
 339 for the EEG 10-10 system.

340 The EEG potential  $V_e(\vec{r}_e, t)$  at the electrode position  $\vec{r}_e$  evoked by a continuous field of  
 341 microscopic electric currents  $I(\vec{r}, t)$  inside the brain  $R$  can be calculated by equation (2) (Riera  
 342 et al. 2012; Herrera et al. 2022):

$$343 \quad V_e(\vec{r}_e, t) = V_0(\vec{r}_e, t) + \frac{1}{4\pi\sigma_b} \sum_k \int_{\Omega_k} \vec{\mathbf{j}}_k(I, \vec{r}) \cdot \nabla \left( \frac{1}{|\vec{r}_e - \vec{r}|} \right) d\vec{r}^3 \quad (2a)$$

$$344 \quad V_0(\vec{r}_e, t) = \frac{1}{4\pi\sigma_b} \int_R \frac{I(\vec{r}, t)}{|\vec{r}_e - \vec{r}|} d\vec{r}^3 \quad (2b)$$

$$345 \quad \int_{\Omega_k} \vec{\mathbf{j}}_k(I, \vec{r}) \cdot \nabla \left( \frac{1}{|\vec{r}_e - \vec{r}|} \right) d\vec{r}^3 \equiv (\sigma_{k+1} - \sigma_k) \int_{S_k} v_k(I, \vec{r}) \cdot \frac{\partial}{\partial \vec{\mathbf{n}}_k} \left( \frac{1}{|\vec{r}_e - \vec{r}|} \right) d\vec{r}^2 \quad (2c)$$

346 with  $\vec{\mathbf{j}}_k(I, \vec{r}) = (\sigma_{k+1} - \sigma_k) v_k(I, \vec{r}) \vec{\mathbf{n}}_k(\vec{r}) / \Delta l$  representing the secondary currents defined for each  
 347 elemental volumetric shell  $\Omega_k$  (i.e., a surface  $S_k$  of thickness  $\Delta l \rightarrow 0$ ).  $\sigma_k$  and  $v_k(I, \vec{r})$  denote the  
 348 conductivity and surface potential of the  $k$ -th compartment in the head model (i.e., brain ( $\sigma_b$ ),  
 349 skull, and scalp), and  $\vec{\mathbf{n}}_k(\vec{r})$  the normal vector to the surface ( $S_k$ ) of the  $k$ -th compartment at the  
 350 location  $\vec{r}$ .

351 Considering that  $I(\vec{r}, t) = s(\vec{r}, t)$  for  $\vec{r} \in V$  and  $I(\vec{r}, t) = 0$  otherwise, where  $V$  is the volume of the  
 352 brain region of interest SEF, centered at  $\vec{r}_m$ ; and the location of the EEG electrodes ( $\vec{r}_e$ ) is far  
 353 enough from the center  $\vec{r}_m$ , then  $V_0(\vec{r}_e, t)$  can be calculated as a function of the multipolar

354 moments (Riera et al. 2012). Under the assumption, the EEG forward model can be  
 355 represented by equation (2a) and the following equation for  $V_0(\vec{r}_e, t)$  (Riera et al. 2012):

$$356 \quad V_0(\vec{r}_e, t) = \frac{1}{4\pi\sigma_b} \left[ \int_{SEF} \frac{m(\vec{r}, t)}{|\vec{r}_e - \vec{r}|} d\vec{r}^3 + \int_{SEF} \vec{d}(\vec{r}, t) \cdot \nabla_{\vec{r}} \left( \frac{1}{|\vec{r}_e - \vec{r}|} \right) d\vec{r}^3 + \int_{SEF} \frac{1}{2} \vec{Q}(\vec{r}, t) : \nabla_{\vec{r}} \left( \frac{1}{|\vec{r}_e - \vec{r}|} \right) d\vec{r}^3 + \dots \right]$$

357 (3)

358 with  $m(t) = \int_{SEF} s(\vec{r}, t) d\vec{r}^3$ ;  $\vec{d}(\vec{r}, t) = \int_{SEF} s(\vec{r}, t)(\vec{r} - \vec{r}_m) d\vec{r}^3$ ; and  $\vec{Q}(\vec{r}, t) = \int_{SEF} s(\vec{r}, t)(\vec{r} - \vec{r}_m)(\vec{r} -$   
 359  $r_m) d\vec{r}^3$ .

360 The first, second, and third terms in equation (3) represent the contribution of the current  
 361 monopole, dipole and quadrupole, etc., to the EEG, respectively. We demonstrated in Herrera  
 362 et al. (2022) that the activity of a cortical column can be accurately represented by a single  
 363 equivalent dipole at the center of the column, whose orientation corresponds to that of the  
 364 cortical surface and whose temporal dynamic is obtained from the laminar CSD. Using this  
 365 approach, we calculated the first three current multipole moments from the experimental and  
 366 simulated CSDs using the following equations:

$$367 \quad m_z(\vec{r}, t) = \pi r_c^2 \int \text{CSD}(z, t) dz \quad (4)$$

$$368 \quad d_z(\vec{r}, t) = \pi r_c^2 \int \text{CSD}(z, t)(z - z_m) dz \quad (5)$$

$$369 \quad Q_{zz}(\vec{r}, t) = \pi r_c^2 \int \text{CSD}(z, t)(z - z_m)^2 dz \quad (6)$$

370 Because of the conservation of current in the neural tissue, the current monopole contribution  
 371 (equation (4)) should be zero (Nunez and Srinivasan 2009). However, if the CSD is unbalanced,  
 372 this might be different from zero. Thus, we imposed a monopole and quadrupole moment at the  
 373 center of the column, at the same location as the equivalent current dipole, to compensate for  
 374 the current imbalance. This was the case for the observed CSD that had no-zero monopole  
 375 contribution. The simulated CSD had zero monopole contribution, as expected since the

376 transmembrane currents of compartment models sum to zero at all times. Estimated EEGs were  
377 calculated considering there were two symmetric brain sources in SEF, one in each  
378 hemisphere. For computing the EEG dipolar contribution, we assumed the orientation of the  
379 dipoles corresponded to that of the cortical surface at the dipoles' location.

## 380 **Quantification and Statistical Analysis**

### 381 ***Spiking activity***

382 We used non-parametric permutation tests for comparing the spike rate features (peak  
383 amplitude, peak latency, and peak half-width) between observed and simulated neurons. We  
384 used a two-tailed paired t-test to calculate the permutation test statistic and the Monte Carlo  
385 method (100,000 permutations for L3 neurons and all possible (40,320) permutations for L5  
386 neurons) for calculating the significance probability, an estimate of the p-value under the  
387 permutation distribution. The p-values were reported in the main text or figure captions. The  
388 amplitude, latency, and half-width of the peak in the spike rates after the saccade were  
389 calculated using the `findpeaks()` function from MATLAB's Signal Processing Toolbox.

### 390 ***Laminar time-varying field potential frequency power maps***

391 We compared the averaged time-varying laminar power maps of error versus correct trials  
392 across sessions (16 sessions, Eu: 6 and X:10) for each frequency band employing  
393 nonparametric clustered-based permutation tests (Maris and Oostenveld 2007). We used a two-  
394 tailed paired t-test to contrast error versus correct trial averages at the sample level (channel-  
395 time-pair samples). Un-smooth power maps were used for the statistical tests. All pairs with t-  
396 statistics larger than the critical threshold ( $\alpha = 0.05$ ) were clustered in connected sets based on  
397 spatial and temporal adjacency. The cluster-level statistic was calculated by taking the sum of  
398 the sample-specific t-statistics within each cluster, and the permutation test statistic was defined

399 as the maximum of the cluster-level test statistic. We utilized the Monte Carlo method for  
400 calculating the significance probability, an estimate of the p-value under the permutation  
401 distribution. We considered the maximum number of unique permutations for comparison  
402 across sessions from each monkey. Significant clusters were determined by comparing their  
403 Monte Carlo p-value to an overall two-tailed critical threshold,  $\alpha = 0.01$  (0.005 for each tail).  
404 For comparing the simulated error and correct trials, we also employed a nonparametric  
405 permutation test but considered a two-tailed unpaired t-test for the sample level statistic (10,000  
406 permutations). In contrast to the experimental data in which we have two experimental  
407 conditions per session, only one experimental condition is assigned to each simulated local field  
408 potential (between-trial analysis) (Maris and Oostenveld 2007).

## 409 **Results**

### 410 **Electrophysiological recordings**

411 Concurrent scalp EEG and laminar recordings of spiking activity and local field potentials (LFPs)  
412 were obtained in supplementary eye field (SEF) of two monkeys (Godlove et al. 2014; Ninomiya  
413 et al. 2015) performing the saccade countermanding stop-signal task (Hanes and Schall 1995)  
414 (Fig. 1). Briefly, monkeys were required to generate a saccade to a peripheral target, but to  
415 inhibit this planned saccade when a stop-signal appeared. Errors occurred when monkeys  
416 generated a saccade despite the appearance of the stop-signal. Monkeys produced response  
417 errors similar to human participants with homologous ERN features (Godlove, Emeric, et al.  
418 2011; Reinhart et al. 2012). A total of 16 perpendicular sessions were (Eu: 6, X: 10) recorded  
419 across monkeys, and resulted in a total of 2,386 trials (Monkey Eu: 1,608; Monkey X: 778) after  
420 response-time matching (Godlove et al. 2014; Ninomiya et al. 2015; Sajad et al. 2019). From  
421 these sessions, we isolated a total of 293 single units (Eu: 104, X: 189), of which 42 neurons  
422 (Eu: 39, X: 3) showed a greater discharge rate following error noncancelled relative to correct

423 saccades (Sajad et al. 2019). The functional properties of these neurons, henceforth referred to  
424 as ‘error neurons’, were described previously (Stuphorn et al. 2000; Sajad et al. 2019). Error  
425 neurons were divided into putative PCs if their spike waveform had a peak to trough width > 250  
426  $\mu\text{s}$  and interneurons if < 250  $\mu\text{s}$  (Sajad et al. 2019). In total, 37/42 recorded error neurons had  
427 broad spike waveforms and were classified as putative PCs. Of these 37, 36 were recorded  
428 from L2-L6 of monkey Eu and 1 from L6 of monkey X.

### 429 **Reproducing the spiking activity of L3 and L5 error putative pyramidal cells**

430 To evaluate the role of error PCs in the midfrontal theta and ERN generation, we first  
431 reproduced their spiking activity using detailed biophysical neuronal models. Most of the  
432 putative error PCs were recorded from L3 and L5 (30/37) (See (Godlove et al. 2014) and (Sajad  
433 et al. 2019) for these methods). Compared to those recorded from L6, they showed a similar  
434 spiking profile relative to saccade onset across. Thus, we focused on modeling the activity of  
435 these two populations of neurons. We employed a model-optimization approach to estimate the  
436 excitatory pre-synaptic inputs received by these neurons around saccade onset. We described  
437 the activity of L3 error PCs using the model proposed by Eyal et al. (2018). L5 error PCs were  
438 described using the Hay et al. (2011) model, including modifications of voltage-gated calcium  
439 channel densities as in Shai et al. (2015) and hyperpolarization-activated cyclic nucleotide –  
440 HCN or Ih – channel density distribution as in Labarrera et al. (2018). The simulations included  
441 only excitatory NMDA and AMPA synaptic inputs with distributions and ratios corresponding to  
442 those in area F7d (SEF) estimated from the literature (Geyer et al. 1998; Rapan et al. 2021).  
443 The total number of NMDA and AMPA synapses per type was fixed for each simulated neuron,  
444 but their location was randomly selected in each neuron and simulation (Fig. 2A, 3A). Non-  
445 specific background pre-synaptic inputs were Poisson processes with a fixed mean (Fig. 2B,  
446 3B).



447 We determined the mean of the Poisson process that replicated the observed mean inter-spike  
448 interval (ISI) distribution and spike rate of observed error PCs during the pre-target period.  
449 Inputs synchronized on saccade production were modeled as spike generators with specified  
450 temporal profiles. On a trial-by-trial basis, pre-synaptic spike times were chosen from a skewed-  
451 normal distribution (Jones et al. 2007). The number of pre-synaptic spikes and their location  
452 along the neuron, as well as their skewness, mean, and standard deviation, were optimized to  
453 reproduce the observed spiking activity of L3 and L5 error PCs.

454 The ISI distribution of L3 putative error PCs during the pre-target and post-saccade period  
455 followed an exponential function (Fig. 2E). In contrast, L5 putative error PCs had a uniform ISI  
456 distribution during the pre-target interval and a double exponential distribution during the post-  
457 saccade period (Fig. 3E). Additionally, L5 error PCs exhibited more bursts after errors compared  
458 to correct trials.

459 To estimate the background inputs to the neurons, we distinguished 3 groups of synaptic inputs  
460 according to their dendritic location—basal, oblique, and distal apical (Fig. 2A, 3A). This  
461 distinction was also used for optimizing the inputs before and after the saccade. We assumed  
462 all synapses belonging to each of these groups were activated by a Poisson process with the  
463 same mean. We simulated the spiking activity of L3 error PCs using a Poisson process with a  
464 mean equal to 3.5 for synapses located in the basal and oblique dendrites and 2.0 for synapses  
465 located in the oblique dendrites and distal apical dendrites. Fig. 2B illustrates the synaptic  
466 activation profile of a representative background input coming to the basal and oblique dendrites  
467 and the distal apical dendrites using the estimated mean of the Poisson processes. Fig. 2E  
468 shows the ISI distribution of the simulated neurons before target presentation and after the  
469 saccade for correct and error trials, respectively. The optimized biophysical models replicated  
470 the observed bursting activity (Fig. 2E). However, the minimum ISI and the normalized number

471 of spikes count per ISI bin were larger than those observed in the experimental data. We  
472 believe this is because simulated L3 PCs could not produce ISIs smaller than 5 ms.

473 To reproduce the baseline activity of L5 error PCs, we only activated basal dendritic synapses  
474 with a Poisson process with a mean equal to 2 (Fig. 3B). Activation of either oblique or distal  
475 apical synapses resulted in an increase in bursting activity that was not present in the observed  
476 data during the pre-target period (Fig. 3E). While we replicated the mean spike rate of the  
477 observed L5 error PCs (Fig. 3D), the simulated ISI distributions favored ISI around 20 ms and  
478 did not show a uniform distribution (Fig. 3E). We believe the differences in the ISI distributions  
479 of observed and simulated error neurons are attributable to differences in the biophysics of the  
480 neuronal models used and variability in the biophysics of recorded neurons, not being captured  
481 by the model (see Discussion).

482 After optimizing the background inputs of the models, we optimized the temporal profile,  
483 location, and sequence of time-locked inputs influencing the neuron after the execution of a  
484 correct or error saccades. We calculated the mean spike rate of recorded L3 and L5 putative  
485 error PCs during the interval from 500 before to 500 ms after saccade initiation (Fig. 2D, 3D).  
486 The observed spike rate of error neurons in L3 and L5 peaked after the execution of a saccade  
487 and slowly returned to a pre-saccadic spike rate with the pre-saccadic spike rate exceeding the  
488 pre-target firing in L5 error PCs.

489 To evaluate the quality of the optimization, we quantified the mean amplitude, latency, and half-  
490 width of the peak (Fig. 2D, 3D). To fit these parameters, we manually optimized the time-locked  
491 inputs for the simulated neurons. The observed spiking activity of L3 error PCs was replicated  
492 by activating half of all the synapses with the same probability distribution and increasing the  
493 number of pre-synaptic spikes in error compared to correct trials (Fig. 2C). Conversely,  
494 simulated L5 error PCs were sensitive to both the location and temporal profile of pre-synaptic

495 inputs as well as to the number of pre-synaptic spikes. Activation of oblique dendrite synapses  
496 facilitated bursting resulting in an exponential, rather than double-exponential, post-saccade ISI  
497 distribution. Thus, our final optimization of time-locked inputs only used basal and distal apical  
498 synapses (Fig. 3C).

499 To replicate the activity of L5 error PCs (Fig. 3D), we needed an initial basal input 70 ms before  
500 the saccade in both trial types (normal distribution:  $\mu = 70\text{ ms}$ ,  $\sigma = 140\text{ ms}$ , 2 pre-synaptic  
501 spikes) followed by a distal apical input 100 ms after the saccade (skewed normal distribution:  
502  $shape = 2$ ,  $\mu = 100\text{ ms}$ ,  $\sigma = 200\text{ ms}$ ) and another basal input 120 ms after the saccade (right  
503 skewed normal distribution:  $shape = 5$ ,  $\mu = 120\text{ ms}$ ,  $\sigma = 250\text{ ms}$ ) (Fig. 3C). After the saccade on  
504 correct trials, all basal dendrite synapses had a probability of receiving 2 pre-synaptic spikes,  
505 and all distal apical synapses had a probability of receiving 1 pre-synaptic spike (Fig. 3C). On  
506 error trials, we needed more pre-synaptic spikes (5) coming to the second basal input around  
507 120 ms after the saccade and a second distal apical input of 1 spike arriving 280 ms after the  
508 saccade (right skewed normal distribution:  $shape = 5$ ,  $\mu = 280\text{ ms}$ ,  $\sigma = 250\text{ ms}$ ) (Fig. 3C). The  
509 increase in sustained firing after saccades observed in L5 error PCs was produced by  
510 increasing the mean of the Poisson process for the basal background inputs from 2 to 4 after  
511 the saccade. As in the simulations of L3 error PCs, only half of the synapses received the time-  
512 locked inputs. Fig. 3E shows the observed and simulated ISI distributions of L5 error PCs in the  
513 post saccade period. In summary, we replicated the spike rate profiles of error PCs and  
514 qualitatively explained their ISI distributions during both the pre-target and post-saccade periods  
515 (Fig. 2 & 3).

## 516 **Error pyramidal cells drive midfrontal theta**

517 Midfrontal theta is a prominent signature of performance monitoring in human EEG studies  
518 (Cavanagh and Frank 2014; Cohen 2014), being elevated on error compared to correct trials.

519 Yet, the cellular mechanisms generating this signal are unknown. Here, we characterized the  
520 presence of theta oscillations in SEF and used biophysical modeling to ascertain whether error  
521 PCs in SEF can produce such a rhythm. First, we measured the laminar profiles of theta ( $\theta$ ) as  
522 well as alpha ( $\alpha$ ), beta ( $\beta$ ), and gamma ( $\gamma$ ) power after correct and error saccades. Because  
523 nearly all L3 and L5 putative error PCs were recorded from monkey Eu, we compared modeling  
524 results with monkey Eu's data. Across sessions we observed a 30-74% increase in theta power  
525 after correct saccades and a 30-122% increase after error saccades (Fig. 4). This increase in  
526 theta power was significantly larger on error versus correct trials (nonparametric clustered-  
527 based permutation test,  $n=6$ ,  $p < 0.01$ ), extending from L3 to deep layers. Maximal  $\theta$  power was  
528 observed just before the peak polarization of the error-related-negativity (Sajad et al. 2019).  
529 These results were consistent across monkeys (Supplemental Fig. S2). We also observed  
530 significantly greater  $\alpha$ ,  $\beta$ , and  $\gamma$  power on error trials in Monkey Eu but not in Monkey X  
531 (Supplemental Fig. S2). The increase was observed in the  $\beta$  and  $\gamma$  bands well after the saccade  
532 and in the  $\alpha$  band after the saccade with a magnitude half that observed for the  $\theta$  band  
533 (Supplemental Fig. S2).

534 To assess the contribution of individual error PCs to the observed increase in the laminar theta  
535 power, we simulated the activity of 625 L3 and 1,000 L5 PCs activated by random samples from  
536 the range of inputs optimized to replicate the error-related modulation and the ISI. Neuron  
537 somas were randomly positioned in L3 and L5 in a cylindrical cortical column of 3 mm diameter,  
538 with height corresponding to the vertical extent in area SEF of lower L3 (700-1100  $\mu\text{m}$  below the  
539 pia matter) and L5 (1125-1750  $\mu\text{m}$  below the pia matter). We calculated the LFP evoked by the  
540 activity of the simulated ensembles of error neurons at 16 equally spaced vertically aligned  
541 points in the center of the cortical column. As in the experiments, the simulated inter-electrode  
542 distance was 150 $\mu\text{m}$ . We compared the observed and simulated grand average laminar LFP  
543 and CSD in correct and error trials and their differences (Fig. 5, Supplemental Fig. S3).

544 The observed laminar CSD could not be described as a single dipole, unlike observations in  
545 visual areas V1 (Mehta et al. 2000; Maier et al. 2011) or V4 (Herrera et al. 2022). Instead, the  
546 observed laminar CSD associated with both correct and error saccades consisted of 3  
547 prominent sinks, one at the L3-L5 border, another in L5, and the third in deep L6. These were  
548 accompanied by a sequence of weaker, transient sinks in upper L3. Likewise, the CSD derived  
549 from the L3 and L5 error PCs simulations consisted of 3 sinks, two in L3 and one in L5. The  
550 simulated laminar CSD differed from the observed and contributed only ~3% to the laminar  
551 CSD, even after summing CSD amplitudes over the contributes from all of the estimated total  
552 number of error neurons in these layers.

553 Following the same analysis pipeline, we calculated the laminar profiles of  $\theta$  power relative to  
554 saccade onset on the simulated LFPs in both correct and error trials. As in the experimental  
555 data, simulated LFPs showed a significantly greater increase in post-saccadic  $\theta$  power on error  
556 versus correct trials (Fig. 4; nonparametric clustered-based permutation test,  $n=20$ ,  $p<0.01$ ).

557 The simulations accounted for just 10% of the observed relative laminar  $\theta$  power, even without  
558 correcting by the actual number of error neurons in SEF. Analysis of the contribution of the  
559 individual populations of L3 and L5 simulated error PCs indicate that L5 error PCs, but not L3  
560 error PCs, produce the increase in  $\theta$  power around saccade. These results indicate that L5 error  
561 PCs contribute to the observed laminar  $\theta$  power but, unexpectedly, contribute little to the  
562 laminar current sources observed in SEF. Additionally, the simulated L3 and L5 error PCs did  
563 not produce the laminar profile observed in the other frequency bands, suggesting these signals  
564 might be generated from other circuit mechanisms (data not shown).

565 To explore whether these results were associated with the intrinsic properties of the neurons,  
566 we simulated the activity of 100 unconnected L3 and L5 PCs receiving randomly activated  
567 synaptic inputs. We looked at the spectral properties of their membrane potentials and evoked

568 LFPs in the absence and presence of the synchronized activation of all synapses 1 s after the  
569 beginning of the simulation. The voltage response of a simulated L3 and L5 PCs produced by  
570 the random input is shown in Supplemental Fig. S4. The power spectrum of the membrane  
571 potential of all L5 PCs but not L3 showed peaks in the low frequencies ( $\theta$  and  $\alpha$  bands) (Fig. 6).  
572 Inspection of the membrane potential  $\theta$  phase revealed a phase-rest across L5 PCs for both  
573 dendritic and somatic membrane potential (Fig. 6B). In contrast, L3 PCs showed a phase-rest in  
574 their dendritic membrane potential, but not in their somatic membrane potential (Fig. 6A).  
575 Laminar LFP  $\theta$  power maps showed an increase in  $\theta$  power only for simulated L5 PCs under  
576 time-locked synchronized inputs (Fig. 6). These results indicate that L5 PCs can act as  
577 pacemakers of  $\theta$  oscillations, but they are masked in the LFP unless the neurons receive a  
578 synchronized input to reset their phases.

#### 579 **Negligible contribution of error neurons to ERN current sources**

580 Next, we employed EEG forward modeling to study SEF contributions to the ERN. We  
581 considered two current dipoles located in SEF symmetrically in each hemisphere (Fig. 7A). The  
582 temporal dynamics of the dipoles were calculated from the observed and simulated laminar  
583 CSDs (Herrera et al. 2022). We estimated EEG from the experimental CSD. Because the  
584 observed CSDs were not simple dipoles, we calculated the first three multipole moments of the  
585 observed CSDs, finding a non-zero monopole contribution arising from unbalanced current  
586 across depth. Fig. 7 shows the multipole moments obtained from the observed CSD in SEF and  
587 the multiple moments evoked by the activity of error PCs. The monopole moment of the  
588 simulated CSDs was by definition zero. In agreement with the previous results, even summing  
589 over the approximate number of error neurons in SEF, the multipole moments produced by the  
590 simulated neurons were three orders of magnitude smaller than those observed in SEF (Fig. 7).  
591 They also had different temporal dynamics (Fig. 7, Supplemental Fig. S5). Perhaps surprisingly,

592 these results indicate a very weak and indirect biophysical contribution of SEF error neurons to  
593 the ERN. Future simulations incorporating other populations of neurons in SEF and the circuit  
594 dynamics are needed to test this hypothesis.

595 A complete forward model of the ERN at electrode FpFz from the SEF included the contribution  
596 of the three multipole moments (Fig. 8A, B). To account for the unbalanced currents in the  
597 observed CSD, the resulting monopole contribution was placed at the center of the equivalent  
598 current dipole in the cortical column. The monopole contribution was 1,000 times larger than the  
599 dipole and quadrupole contributions, which were of nearly equivalent magnitudes. The  
600 dynamics of the dipole moments paralleled the ERN. In contrast, the dynamics of the  
601 quadrupolar component coincided with the Pe (Fig. 8B). The SEF EEG predicted from the  
602 combination of all CSD multipole moments paralleled the dynamics of the ERN and Pe but  
603 differed substantially in magnitude (Fig. 8C). The EEG predicted by the CSD measured in SEF  
604 contributed somewhat to the ERN and weakly to the Pe component. To distinguish further the  
605 contribution of the SEF to the ERN and the Pe, we determined how the magnitude of each ERP  
606 varied with the diameter of the cortical column in which the currents were summed. As the  
607 diameter of the cortical column increased, the magnitude of the ERN varied as 1 to 4, but the  
608 magnitude of the Pe component increased as 1 to 2.

## 609 **Discussion**

610 The ERN and midfrontal  $\theta$  have been useful biomarkers for neurological and psychiatric  
611 disorders in both basic research and clinical settings. Yet, there is a limited understanding of the  
612 cellular-level mechanisms originating these signals. Intracortical recordings in areas stipulated  
613 to be generators of these extracranial signals offer insights into their laminar origin through CSD  
614 and time-frequency analyses. However, these approaches need to be combined with detailed  
615 biophysical modeling of distinct neuronal populations to help elucidate their underlying cell-

616 specific mechanisms. Here, we evaluated the contribution of putative error PCs to the ERN and  
617 midfrontal  $\theta$  using a model-fitting approach that estimates the pre-synaptic inputs to these  
618 neurons from their spiking activity. Our biophysical model was able to capture small differences  
619 (few spikes) in the response rates of these error PCs. Our results suggest L5 putative error  
620 PCs, but not L3, contribute to error-related increases in midfrontal  $\theta$ , and neither L5 nor L3 error  
621 PCs contribute biophysically to the ERN current sources. Furthermore, we estimated the SEF  
622 contribution to the scalp ERN using a multipolar expansion. Fitting well-established biophysical  
623 models for neocortical PCs to account for the spiking rates of error neurons with broadband  
624 spikes reinforces the conjecture that most these spikes were in fact from PCs.

### 625 **Neuron and circuit contributions to $\theta$ rhythm**

626 Cognitive conflict detection and signaling have been associated with midfrontal  $\theta$   
627 synchronization (Cavanagh and Frank 2014; Cohen 2014). In 2014, Michael X. Cohen proposed  
628 a microcircuit model for such generation in which  $\theta$  bursting, transient increase in  $\theta$  power,  
629 resulted from conflict detection through L5 PCs in their apical dendrites and EEG  
630 rhythmogenesis from L3 circuitual interactions between PCs and interneurons (Cohen 2014).  
631 Cohen hypothesized conflict detection mechanisms carried by L5 PCs would boost ongoing  
632 oscillations in L2/3 but would not drive such oscillations or need phase resetting by an external  
633 stimulus or response (Cohen 2014). In alignment with Cohen's hypothesis, our model predicts a  
634 transient increase in  $\theta$  power due to conflict detection in L5 PCs. However, our results show that  
635 L5 PCs' intrinsic dynamics can drive  $\theta$  oscillations and that they are only visible on the LFPs  
636 and EEG after phase-reset by synchronized synaptic inputs. These oscillations can be stronger  
637 in upper layers due to ionic channels (e.g.,  $I_h$  and  $Ca^{2+}$  channels) present in the apical dendrites  
638 of L5 PCs.



639 Studies of the origin of  $\theta$  oscillation in the hippocampus showed that pharmacological blockage  
640 of HCN1 ( $I_h$ ) channels or genetic deletion disrupts  $\theta$  oscillations (Dickson et al. 2000; Giocomo  
641 and Hasselmo 2009; Colgin 2013; Stark et al. 2013). Additionally, it has been suggested these  
642 oscillations may originate from the inter-play between these channels and the persistent sodium  
643 ( $Nap$ ), muscarinic  $K^+$  ( $M$ ) and slow low threshold  $K^+$  ( $K_{slow}$ ) channels (Dickson et al. 2000;  
644 Buzsáki 2002; Wang 2010; Womelsdorf et al. 2014). The L5 PC model used in our simulations  
645 included HCN1 and M channels throughout the neuron and  $Nap$  and  $K_{slow}$  channels only in the  
646 axon section (Leleo and Segev 2021). Hippocampal  $\theta$  has also been linked to NMDA and “slow”  
647 GABA<sub>A</sub> receptors (Buzsáki 2002). A recent computational modeling study found that  
648 subthalamic  $\theta$  under response conflict required NMDA, but not AMPA, currents, and that the  
649 induced  $\theta$  oscillations did not emerge from intrinsic network dynamics but were elicited in  
650 response to cortical inputs (Moolchand et al. 2022). Our model considered AMPA and NMDA  
651 synapses in both PC models, yet the L3 PC model did not show subthreshold membrane  
652 potential  $\theta$  oscillations or induce LFP  $\theta$  oscillations.

### 653 **ERN generation**

654 The current source density derived from the simulated L3 and L5 error PCs could not explain  
655 the observed association between error-related neuron spiking and EEG of L3 but not L5  
656 neurons (Sajad et al. 2019). Yet, error PCs contribute to the observed laminar  $\theta$  power. This  
657 finding should not be surprising given the presence of neurons signaling error and reward  
658 gain/loss across SEF layers and the uncertainty about how error signals arise. One could  
659 hypothesize that error signals arrive in middle layer from thalamic afferents similar to visual  
660 afferents. However, the laminar organization of the error-related CSDs and visually evoked  
661 CSDs (Godlove et al. 2014) in SEF are not strictly dipolar as that found in sensory and visual

662 areas. Because the error-related CSD is different from the visually evoked CSD, the error signal  
663 is not just an efferent copy arriving in middle layers of SEF.

664 Our EEG forward modeling indicates SEF is a neural generator of the ERN/Pe, but other  
665 sources are needed to fully explain these ERP components. The most likely source is the  
666 medial cingulate cortex (MCC), but we have little information about the laminar CSD of d/vMCC.  
667 Recently, Fu et al. (2019) found that both dMCC and pre-supplementary motor area (pre-SMA)  
668 contribute to the ERN, but at different times. Specifically, the activity of error neurons in pre-  
669 SMA preceded the activity of error neurons in dMCC. Their findings support our hypothesis that  
670 dMCC is the most likely contributor to the Pe, which could not be explained by the SEF EEG  
671 forward model. The observed CSD shows a strong monopolar component of diffuse origin,  
672 suggesting either the presence of strong electro-diffusion (Hanes et al. 2016), the existence of  
673 extended dendritic currents, or that the proposed mesoscopic source model (z-dependency) is  
674 inadequate. However, an early dipolar component explained the ERN features (i.e., peak and  
675 latency), and a late quadrupolar component peaks at Pe.

#### 676 **Limitations of the model**

677 Our model accounted for the activity of error PCs in SEF considering excitatory synaptic inputs  
678 (NMDA and AMPA), but not GABAergic inputs. We mimicked the presence of inhibitory inputs  
679 by adjusting the number and intensity of excitatory synapses. However, SEF possesses a large  
680 density of GABA receptors throughout the cortical layers (Rapan et al. 2021), which should be  
681 incorporated into the model in future studies to evaluate their role in midfrontal  $\theta$  generation. In  
682 this study, we created nonparametric representations (Supplemental Fig. S6) of the laminar  
683 density of interneuron populations in SEF (i.e., calbindin “CB”, parvalbumin “PV” and calretinin  
684 “CR”). We expect the incorporation of inhibitory synaptic inputs might change the intensity and  
685 temporal profiles of the estimated inputs to the simulated error PCs, but we expect the location

686 and timing of the inputs to be close to those estimated in this study. We also expect changes in  
687 the morphology and biophysical properties of the neuron to affect the intensity and temporal  
688 profiles of the estimated inputs.

689 We used neuronal models from other species (human L3 and rat L5 PCs) to reproduce the  
690 spiking profiles of the recorded neurons. Thus, we could only reproduce to some extent their ISI  
691 distributions. The L3 PC model could not fire APs with an ISI below 5ms, whereas the  
692 experimental data had a minimum ISI of 2ms. The L5 PC model produced more bursting activity  
693 than observed in the experimental data. In addition, both neuronal models produced baseline  
694 spike rates slightly larger than those for the recorded neurons. This could be associated with  
695 differences in dendritic branching between rodent/human and non-human primate neurons,  
696 resulting in different electrophysiological properties (Gilman et al. 2017; Luebke 2017; Kalmbach  
697 et al. 2018, 2021; González-Burgos et al. 2019; Galakhova et al. 2022). Additionally, our model  
698 was constrained by the data of Monkey Eu alone since Monkey X had no error neurons in L3  
699 and L5.

700 In the predictions of the SEF contribution to the observed EEG, we found a current unbalance  
701 across depths in the CSD. This could be attributed to electro-diffusion given the larger density of  
702 glial cells compared to neurons in the agranular pre-frontal cortex of macaque monkeys  
703 (Dombrowski et al. 2001; Turner et al. 2016) and the presence of dendrites from nearby  
704 columns whose returning currents are not within the modeled column. As expected, we did not  
705 find a current unbalance in the simulated CSDs, which were calculated using the same methods  
706 and code as the observed CSDs. Hence, we might need to incorporate monopolar  
707 compensation in the CSD analysis to guarantee the current balance and account for such  
708 phenomena.

709 **Limitations of the data**

710 We used data from two macaque monkeys recorded over three sites within SEF (one site in  
711 monkey Eu and two in monkey X). We observed differences in the laminar CSDs across  
712 monkeys, indicating a possible modular structure of SEF (Supplemental Fig. S3A). This  
713 hypothesis is supported by the presence of L3 and L5 error neurons in Monkey Eu, but not in  
714 either recording location of Monkey X. Furthermore, the laminar CSD profiles of both monkeys  
715 associated with correct and error responses were not dipolar, unlike V1, V4, and barrel cortex  
716 (Herrera et al. 2022).

717 **Future directions**

718 Although our model captured the spiking profiles of L3 and L5 error PCs, future studies will  
719 benefit from the construction of neuronal models with different morphologies for macaque  
720 monkeys' pre-frontal cortex. Additionally, sampling more sites in and around SEF will allow us to  
721 test the generality of the spiking profiles of the modeled error PCs and, hence, of our model,  
722 and evaluate the possible modular structure of SEF. Laminar recordings in d/v MCC are also  
723 needed to study its laminar organization and estimate the laminar current sources contributing  
724 to the ERN/Pe. This will allow us to formulate more complete EEG forward modeling  
725 frameworks to explain the neuronal origin of the ERN/Pe. Finally, a general CSD method that  
726 account for the existence of diffusive monopolar sources and/or compensate fictitious  
727 monopolar components must be developed to have a more reliable multiscale interpretation.

728 **Funding**

729 This work was supported by the National Institute of Mental Health (grant numbers  
730 F31MH129101, R01MH55806); National Eye Institute (grant numbers P30EY008126,  
731 R01EY019882); Canadian Institutes of Health Research Postdoctoral Fellowship; Natural  
732 Sciences and Engineering Research Council of Canada (RGPIN-2022-04592); and FIU SEED  
733 Grant Wallace Coulter Foundation.

734

735 **Acknowledgments**

736 The authors would like to thank Dr. Julio Martinez-Trujillo for useful conversations regarding the  
737 work.

738

739 **Author Contributions**

740 Conceptualization, B.H., J.D.S. and J.J.R.; Methodology, B.H. and J.J.R.; Investigation, B.H.;  
741 Experimental design, J.D.S.; Data collection, J.D.S.; Validation, B.H.; Formal Analysis, B.H.,  
742 A.S. and S.P.E.; Writing – Original Draft, B.H.; Writing – Review & Editing, B.H., A.S., S.P.E.,  
743 J.D.S. and J.J.R.; Visualization, B.H.; Resources, J.D.S. and J.J.R.; Software, B.H. and J.J.R.;  
744 Funding Acquisition, B.H., J.D.S. and J.J.R.; Supervision, J.D.S. and J.R.D.

745

746 **Data and Software Availability**

747 Code for the simulations and analysis conducted in this study will be openly available on GitHub  
748 as of the date of publication. Processed data will also be available through OFS as of the date  
749 of publication. The raw data analyzed in the current study are available from Jeffrey D. Schall

750 ([schalljd@yorku.ca](mailto:schalljd@yorku.ca)) on reasonable request. Requests for materials should be addressed to the  
751 corresponding author Jorge J. Riera ([jrieradi@fiu.edu](mailto:jrieradi@fiu.edu)).

752

### 753 **Declaration of Interests**

754 The authors declare no competing interests.

755

### 756 **References**

757 Armstrong IT, Munoz DP. 2003. Inhibitory control of eye movements during oculomotor  
758 countermanding in adults with attention-deficit hyperactivity disorder. *Exp Brain Res.*  
759 152:444–452.

760 Aron AR, Fletcher PC, Bullmore ET, Sahakian BJ, Robbins TW. 2003. Stop-signal inhibition  
761 disrupted by damage to right inferior frontal gyrus in humans. *Nat Neurosci.* 6:115–116.

762 Beul SF, Hilgetag CC. 2019. Neuron density fundamentally relates to architecture and  
763 connectivity of the primate cerebral cortex. *Neuroimage.* 189:777–792.

764 Buzsáki G. 2002. Theta oscillations in the hippocampus. *Neuron.*

765 Cavanagh JF, Frank MJ. 2014. Frontal theta as a mechanism for cognitive control. *Trends Cogn*  
766 *Sci.* 18:414–421.

767 Cohen MX. 2014. A neural microcircuit for cognitive conflict detection and signaling. *Trends*  
768 *Neurosci.* 37:480–490.

769 Colgin LL. 2013. Mechanisms and Functions of Theta Rhythms. *Annu Rev Neurosci.* 36:295–  
770 312.

- 771 Datta D, Arion D, Lewis DA. 2015. Developmental Expression Patterns of GABAA Receptor  
772 Subunits in Layer 3 and 5 Pyramidal Cells of Monkey Prefrontal Cortex. *Cerebral Cortex*.  
773 25:2295–2305.
- 774 Denker M, Yegenoglu A, Grün S. 2018. Collaborative HPC-enabled workflows on the HBP  
775 Collaboratory using the Elephant framework. *Neuroinformatics* 2018.
- 776 Dickson CT, Magistretti J, Shalinsky MH, Fransén E, Hasselmo ME, Alonso A. 2000. Properties  
777 and role of I(h) in the pacing of subthreshold oscillations in entorhinal cortex layer II  
778 neurons. *J Neurophysiol*. 83:2562–2579.
- 779 Dombrowski SM, Hilgetag CC, Barbas H. 2001. Quantitative architecture distinguishes  
780 prefrontal cortical systems in the rhesus monkey. *Cerebral cortex*. 11:975–988.
- 781 Donohoe G, Reilly R, Clarke S, Meredith S, Green B, Morris D, Gill M, Corvin A, Garavan H,  
782 Robertson IH. 2006. Do antisaccade deficits in schizophrenia provide evidence of a  
783 specific inhibitory function? *Journal of the International Neuropsychological Society*.  
784 12:901–906.
- 785 Emeric EE, Brown JW, Leslie M, Pouget P, Stuphorn V, Schall JD. 2008. Performance  
786 Monitoring Local Field Potentials in the Medial Frontal Cortex of Primates: Anterior  
787 Cingulate Cortex. *J Neurophysiol*. 99:759–772.
- 788 Emeric EE, Leslie M, Pouget P, Schall JD. 2010. Performance Monitoring Local Field Potentials  
789 in the Medial Frontal Cortex of Primates: Supplementary Eye Field. *J Neurophysiol*.  
790 104:1523–1537.
- 791 Eyal G, Verhoog MB, Testa-Silva G, Deitcher Y, Piccione RB, DeFelipe J, de Kock CPJJ,  
792 Mansvelder HD, Segev I, Benavides-Piccione R, DeFelipe J, de Kock CPJJ, Mansvelder

- 793 HD, Segev I. 2018. Human Cortical Pyramidal Neurons: From Spines to Spikes via Models.  
794 *Front Cell Neurosci.* 12:181.
- 795 Fu Z, Sajad A, Errington SP, Schall JD, Rutishauser U. 2023. Neurophysiological mechanisms  
796 of error monitoring in human and non-human primates. *Nat Rev Neurosci.* 1–20.
- 797 Fu Z, Wu DAJ, Ross I, Chung JM, Mamelak AN, Adolphs R, Rutishauser U. 2019. Single-  
798 Neuron Correlates of Error Monitoring and Post-Error Adjustments in Human Medial  
799 Frontal Cortex. *Neuron.* 101:165-177.e5.
- 800 Galakhova AA, Hunt S, Wilbers R, Heyer DB, de Kock CPJ, Mansvelder HD, Goriounova NA.  
801 2022. Evolution of cortical neurons supporting human cognition. *Trends Cogn Sci.*
- 802 Garavan H, Ross TJ, Kaufman J, Stein EA. 2003. A midline dissociation between error-  
803 processing and response-conflict monitoring. *Neuroimage.* 20:1132–1139.
- 804 Gehring WJ, Liu Y, Orr JM, Carp J. 2012. The Error-Related Negativity (ERN/Ne). In: *The*  
805 *Oxford Handbook of Event-Related Potential Components.* Oxford University Press.
- 806 Geyer S, Matelli M, Luppino G, Schleicher A, Jansen Y, Palomero-Gallagher N, Zilles K. 1998.  
807 Receptor autoradiographic mapping of the mesial motor and premotor cortex of the  
808 macaque monkey. *Journal of Comparative Neurology.* 397:231–250.
- 809 Giacometti P, Perdue KL, Diamond SG. 2014. Algorithm to find high density EEG scalp  
810 coordinates and analysis of their correspondence to structural and functional regions of the  
811 brain. *J Neurosci Methods.* 229:84–96.
- 812 Gilman JP, Medalla M, Luebke JI. 2017. Area-specific features of pyramidal neurons-a  
813 comparative study in mouse and rhesus monkey. *Cerebral Cortex.* 27:2078–2094.



- 814    Giocomo LM, Hasselmo ME. 2009. Knock-Out of HCN1 Subunit Flattens Dorsal–Ventral  
815            Frequency Gradient of Medial Entorhinal Neurons in Adult Mice. *Journal of Neuroscience*.  
816            29:7625–7630.
- 817    Godlove DC, Emeric EE, Segovis CM, Young MS, Schall JD, Woodman GF. 2011. Event-  
818            Related Potentials Elicited by Errors during the Stop-Signal Task. I. Macaque Monkeys.  
819            *Journal of Neuroscience*. 31:15640–15649.
- 820    Godlove DC, Garr AK, Woodman GF, Schall JD. 2011. Measurement of the extraocular spike  
821            potential during saccade countermanding. *J Neurophysiol*. 106:104–114.
- 822    Godlove DC, Maier A, Woodman GF, Schall JD. 2014. Microcircuitry of Agranular Frontal  
823            Cortex: Testing the Generality of the Canonical Cortical Microcircuit. *Journal of*  
824            *Neuroscience*. 34:5355–5369.
- 825    González-Burgos G, Miyamae T, Krimer Y, Gulchina Y, Pafundo DE, Krimer O, Bazmi H, Arion  
826            D, Enwright JF, Fish KN, Lewis DA. 2019. Distinct Properties of Layer 3 Pyramidal  
827            Neurons from Prefrontal and Parietal Areas of the Monkey Neocortex. *Journal of*  
828            *Neuroscience*. 39:7277–7290.
- 829    Hagen E, Næss S, Ness T V., Einevoll GT. 2018. Multimodal Modeling of Neural Network  
830            Activity: Computing LFP, ECoG, EEG, and MEG Signals With LFPy 2.0. *Front*  
831            *Neuroinform*. 12:92.
- 832    Halnes G, Mäki-Marttunen T, Keller D, Pettersen KH, Andreassen OA, Einevoll GT. 2016. Effect  
833            of Ionic Diffusion on Extracellular Potentials in Neural Tissue. *PLoS Comput Biol*.  
834            12:e1005193.
- 835    Hanes DP, Schall JD. 1995. Countermanding saccades in macaque. *Vis Neurosci*. 12:929–937.

- 836 Hanisch C, Radach R, Holtkamp K, Herpertz-Dahlmann B, Konrad K. 2006. Oculomotor  
837 inhibition in children with and without attention-deficit hyperactivity disorder (ADHD). *J*  
838 *Neural Transm.* 113:671–684.
- 839 Hay E, Hill S, Schürmann F, Markram H, Segev I. 2011. Models of neocortical layer 5b  
840 pyramidal cells capturing a wide range of dendritic and perisomatic active properties. *PLoS*  
841 *Comput Biol.* 7:e1002107.
- 842 Herrera B, Westerberg JA, Schall MS, Maier A, Woodman GF, Schall JD, Riera JJ. 2022.  
843 Resolving the mesoscopic missing link: Biophysical modeling of EEG from cortical columns  
844 in primates. *Neuroimage.* 263:119593.
- 845 Hines ML, Davison AP, Muller E. 2009. NEURON and Python. *Front Neuroinform.* 3:1.
- 846 Ito S, Stuphorn V, Brown JW, Schall JD. 2003. Performance monitoring by the anterior cingulate  
847 cortex during saccade countermanding. *Science (1979).* 302:120–122.
- 848 Jahr C, Stevens C. 1990. A quantitative description of NMDA receptor-channel kinetic behavior.  
849 *The Journal of Neuroscience.* 10:1830–1837.
- 850 Jones SR, Pritchett DL, Stufflebeam SM, Hamalainen M, Moore CI. 2007. Neural Correlates of  
851 Tactile Detection: A Combined Magnetoencephalography and Biophysically Based  
852 Computational Modeling Study. *Journal of Neuroscience.* 27:10751–10764.
- 853 Jung B, Taylor PA, Seidlitz J, Sponheim C, Perkins P, Ungerleider LG, Glen D, Messinger A.  
854 2021. A comprehensive macaque fMRI pipeline and hierarchical atlas. *Neuroimage.*  
855 235:117997.
- 856 Kalmbach BE, Buchin A, Long B, Close J, Nandi A, Miller JA, Bakken TE, Hodge RD, Chong P,  
857 de Frates R, Dai K, Maltzer Z, Nicovich PR, Keene CD, Silbergeld DL, Gwinn RP, Cobbs  
858 C, Ko AL, Ojemann JG, Koch C, Anastassiou CA, Lein ES, Ting JT. 2018. h-Channels

- 859           Contribute to Divergent Intrinsic Membrane Properties of Supragranular Pyramidal  
860           Neurons in Human versus Mouse Cerebral Cortex. *Neuron*. 100:1194-1208.e5.
- 861   Kalmbach BE, Hodge RD, Jorstad NL, Owen S, de Frates R, Yanny AM, Dalley R, Mallory M,  
862           Graybuck LT, Radaelli C, Keene CD, Gwinn RP, Silbergeld DL, Cobbs C, Ojemann JG, Ko  
863           AL, Patel AP, Ellenbogen RG, Bakken TE, Daigle TL, Dee N, Lee BR, McGraw M, Nicovich  
864           PR, Smith K, Sorensen SA, Tasic B, Zeng H, Koch C, Lein ES, Ting JT. 2021. Signature  
865           morpho-electric, transcriptomic, and dendritic properties of human layer 5 neocortical  
866           pyramidal neurons. *Neuron*. 109:2914-2927.e5.
- 867   Kastellakis G, Cai DJ, Mednick SC, Silva AJ, Poirazi P. 2015. Synaptic clustering within  
868           dendrites: An emerging theory of memory formation. *Prog Neurobiol*.
- 869   Labarrera C, Deitcher Y, Dudai A, Weiner B, Kaduri Amichai A, Zylbermann N, London M. 2018.  
870           Adrenergic Modulation Regulates the Dendritic Excitability of Layer 5 Pyramidal Neurons In  
871           Vivo. *Cell Rep*. 23:1034–1044.
- 872   Lee WH, Lisanby SH, Laine AF, Peterchev A v. 2015. Electric Field Model of Transcranial  
873           Electric Stimulation in Nonhuman Primates: Correspondence to Individual Motor Threshold.  
874           *IEEE Trans Biomed Eng*. 62:2095–2105.
- 875   Leleo EG, Segev I. 2021. Burst control: Synaptic conditions for burst generation in cortical layer  
876           5 pyramidal neurons. *PLoS Comput Biol*. 17:e1009558.
- 877   Lindén H, Hagen E, Łęski S, Norheim ES, Pettersen KH, Einevoll GT. 2014. LFPy: a tool for  
878           biophysical simulation of extracellular potentials generated by detailed model neurons.  
879           *Front Neuroinform*. 7:41.
- 880   Luebke JI. 2017. Pyramidal neurons are not generalizable building blocks of cortical networks.  
881           *Front Neuroanat*. 11:11.

- 882 Maier A, Aura CJ, Leopold DA. 2011. Infragranular Sources of Sustained Local Field Potential  
883 Responses in Macaque Primary Visual Cortex. *Journal of Neuroscience*. 31:1971–1980.
- 884 Mäki-Marttunen T, Haines G, Devor A, Metzner C, Dale AM, Andreassen OA, Einevoll GT.  
885 2018. A stepwise neuron model fitting procedure designed for recordings with high spatial  
886 resolution: Application to layer 5 pyramidal cells. *J Neurosci Methods*. 293:264–283.
- 887 Maris E, Oostenveld R. 2007. Nonparametric statistical testing of EEG- and MEG-data. *J*  
888 *Neurosci Methods*. 164:177–190.
- 889 Mehta AD, Ulbert I, Schroeder CE. 2000. Intermodal Selective Attention in Monkeys. I:  
890 Distribution and Timing of Effects across Visual Areas. *Cerebral Cortex*. 10:343–358.
- 891 Moolchand P, Jones SR, Frank MJ. 2022. Biophysical and Architectural Mechanisms of  
892 Subthalamic Theta under Response Conflict. *The Journal of Neuroscience*. JN-RM-2433-  
893 19.
- 894 Ninomiya T, Dougherty K, Godlove DC, Schall JD, Maier A. 2015. Microcircuitry of agranular  
895 frontal cortex: contrasting laminar connectivity between occipital and frontal areas. *J*  
896 *Neurophysiol*. 113:3242–3255.
- 897 Nunez PL, Srinivasan R. 2009. *Electric Fields of the Brain: The neurophysics of EEG*, *Electric*  
898 *Fields of the Brain: The neurophysics of EEG*. Oxford University Press.
- 899 Oostenveld R, Fries P, Maris E, Schoffelen J-M. 2011. FieldTrip: Open source software for  
900 advanced analysis of MEG, EEG, and invasive electrophysiological data. *Comput Intell*  
901 *Neurosci*. 2011:156869.
- 902 Penadés R, Catalán R, Rubia K, Andrés S, Salamero M, Gastó C. 2007. Impaired response  
903 inhibition in obsessive compulsive disorder. *European Psychiatry*. 22:404–410.

- 904 Pettersen KH, Devor A, Ulbert I, Dale AM, Einevoll GT. 2006. Current-source density estimation  
905 based on inversion of electrostatic forward solution: Effects of finite extent of neuronal  
906 activity and conductivity discontinuities. *J Neurosci Methods*. 154:116–133.
- 907 Rapan L, Froudust-Walsh S, Niu M, Xu T, Funck T, Zilles K, Palomero-Gallagher N. 2021.  
908 Multimodal 3D atlas of the macaque monkey motor and premotor cortex. *Neuroimage*.  
909 226:117574.
- 910 Reinhart RMG, Carlisle NB, Kang MS, Woodman GF. 2012. Event-related potentials elicited by  
911 errors during the stop-signal task. II: Human effector-specific error responses. *J*  
912 *Neurophysiol*. 107:2794–2807.
- 913 Riera JJ, Ogawa T, Goto T, Sumiyoshi A, Nonaka H, Evans A, Miyakawa H, Kawashima R.  
914 2012. Pitfalls in the dipolar model for the neocortical EEG sources. *J Neurophysiol*.  
915 108:956–975.
- 916 Sajad A, Errington SP, Schall JD. 2022. Functional architecture of executive control and  
917 associated event-related potentials in macaques. *Nat Commun*. 13:6270.
- 918 Sajad A, Godlove DC, Schall JD. 2019. Cortical microcircuitry of performance monitoring. *Nat*  
919 *Neurosci*. 22:265–274.
- 920 Scangos KW, Aronberg R, Stuphorn V. 2013. Performance monitoring by presupplementary  
921 and supplementary motor area during an arm movement countermanding task. *J*  
922 *Neurophysiol*. 109:1928–1939.
- 923 Schall JD. 1991. Neuronal activity related to visually guided saccades in the frontal eye fields of  
924 rhesus monkeys: comparison with supplementary eye fields. *J Neurophysiol*. 66:559–579.
- 925 Schlag J, Schlag-Rey M. 1987. Evidence for a supplementary eye field. *J Neurophysiol*.  
926 57:179–200.

- 927 Shai AS, Anastassiou CA, Larkum ME, Koch C. 2015. Physiology of Layer 5 Pyramidal Neurons  
928 in Mouse Primary Visual Cortex: Coincidence Detection through Bursting. *PLoS Comput*  
929 *Biol.* 11:e1004090.
- 930 Stark E, Eichler R, Roux L, Fujisawa S, Rotstein HG, Buzsáki G. 2013. Inhibition-Induced theta  
931 resonance in cortical circuits. *Neuron.* 80:1263–1276.
- 932 Stuphorn V, Taylor TL, Schall JD. 2000. Performance monitoring by the supplementary eye  
933 field. *Nature.* 408:857–860.
- 934 Tadel F, Baillet S, Mosher JC, Pantazis D, Leahy RM. 2011. Brainstorm: A user-friendly  
935 application for MEG/EEG analysis. *Comput Intell Neurosci.* 2011:13.
- 936 Turner EC, Young NA, Reed JL, Collins CE, Flaherty DK, Gabi M, Kaas JH. 2016. Distributions  
937 of Cells and Neurons across the Cortical Sheet in Old World Macaques. *Brain Behav Evol.*  
938 88:1–13.
- 939 Verbruggen F, Logan GD. 2009. Models of response inhibition in the stop-signal and stop-  
940 change paradigms. *Neurosci Biobehav Rev.*
- 941 Wang X-J. 2010. Neurophysiological and Computational Principles of Cortical Rhythms in  
942 Cognition. *Physiol Rev.* 90:1195–1268.
- 943 Womelsdorf T, Valiante TA, Sahin NT, Miller KJ, Tiesinga P. 2014. Dynamic circuit motifs  
944 underlying rhythmic gain control, gating and integration. *Nat Neurosci.*
- 945 Yadav A, Gao YZ, Rodriguez A, Dickstein DL, Wearne SL, Luebke JI, Hof PR, Weaver CM.  
946 2012. Morphologic evidence for spatially clustered spines in apical dendrites of monkey  
947 neocortical pyramidal cells. *Journal of Comparative Neurology.* 520:2888–2902.
- 948

949 **Figure Legends**

950 **Fig. 1:** Experimental procedures and methodology. **A.** Stop-signal saccade countermanding  
951 task. All trials started with the presentation of a square fixation marker. Monkeys were required  
952 to hold fixation for a variable interval after which the center of the square was extinguished  
953 simultaneous with presentation of a peripheral target on the right or left. On no-stop-signal trials,  
954 monkeys shifted gaze to the target, whereupon after  $600 \pm 0$  ms a high-pitched tone was  
955 delivered followed  $600 \pm 0$  ms later by fluid reward. On stop-signal trials, a variable stop-signal  
956 delay (SSD) after target presentation the center of the fixation spot was re-illuminated  
957 instructing the monkey to inhibit the planned saccade. If monkeys canceled the saccade, the  
958 high-pitch tone was presented after  $1,500 \pm 0$  followed  $600 \pm 0$  ms later by fluid reward. SSD  
959 was adjusted such that monkeys successfully canceled the saccade in ~50% of the trials. If  
960 monkeys produced a noncanceled error, a low-pitch tone was presented  $600 \pm 0$  ms after the  
961 saccade and no fluid reward was delivered. **B.** Schematic of concurrent EEG and LFP recording  
962 in SEF used to calculate theta power and current source density after saccades (top) and mean  
963 spike rate of representative L3 and L5 putative error PCs (bottom).

964

965 **Fig. 2:** Simulation of L3 error pyramidal cells optimized to replicate observed discharge rates  
966 and inter-spike intervals. **A.** Representative randomized locations of NMDA (pink) and AMPA  
967 (cyan) synapses on simulated L3 pyramidal cell (ModelDB, accession #238347,  
968 2013\_03\_06\_cell03\_789\_H41\_03, active model cell0603\_08\_model\_602). **B.** Observed  
969 baseline spiking statistics were replicated by activating NMDA and AMPA synapses located on  
970 the distal apical (dark blue), basal (orange) and oblique (light green) dendrites. The timing of  
971 pre-synaptic inputs was drawn from Poisson distributions with a mean of 2 for basal and oblique  
972 dendritic synapses and mean of 3.5 for distal apical synapses. **C.** Spiking statistics after

973 saccade initiation were simulated by activating distal apical and basal synapses with spike times  
974 drawn from a left skewed normal probability distribution (skewness = -1). To replicate observed  
975 post-saccadic error-related modulation, for correct trials 2 spikes were drawn from a distribution  
976 with mean 216.6 ms  $\pm$  standard deviation 141.6 ms, and for error trials 4 spikes, from a  
977 distribution with 298.6 ms  $\pm$  178.6 ms. The vertical lines indicate the total number of pre-  
978 synaptic spikes that each synapse will receive under its associated probability distribution. **D.**  
979 Observed (black) and simulated (red) mean spike rate for correct (thin solid) and error (thick  
980 dotted) trials (left) with comparisons of observed (black) and simulated (red) peak amplitude,  
981 peak latency, and peak half width (right). Based on non-parametric permutation tests the  
982 simulated values were not different from observed amplitude (correct trials,  $p = 0.5107$ ; error,  $p$   
983  $= 0.0654$ ), peak latency (correct,  $p = 0.2449$ ; error,  $p = 0.5449$ ), and peak half width for correct  
984 ( $p = 0.1083$ ) but not error trials ( $p = 0.00036$ ). **E.** Observed (top) and simulated (bottom)  $ISI_{n+1}$   
985 versus  $ISI_n$  with heatmap indicating the normalized number of spikes count per bin and marginal  
986 distributions before target presentation (left) and after correct (middle) and error (right)  
987 saccades. Simulated ISI produced the observed bursting pattern of successive ISI.

988

989 **Fig. 3:** Simulation of L5 error pyramidal cells optimized to replicate observed discharge rates  
990 and inter-spike intervals. Conventions as in Fig. 2. **A.** Representative randomized locations of  
991 NMDA (pink) and AMPA (cyan) synapses on simulated L5 pyramidal cell (ModelDB, accession  
992 #139653, "cell #1"). **B.** Observed baseline spiking statistics were replicated by activating NMDA  
993 and AMPA synapses on the basal dendrites with input times drawn from Poisson distributions  
994 with a mean of 2. **C.** Spiking statistics before all saccades were simulated by activating basal  
995 dendrites with inputs sufficient to produce 2 spikes drawn from a normal distribution ( $\sigma = 140$   
996 ms) centered 70 ms before saccade initiation. Spiking statistics after correct saccades were



997 simulated with inputs to distal apical dendrites drawn from a right skewed normal distribution  
998 (skewness = 2,  $\sigma$  = 200 ms) centered 100 ms after the saccade plus a basal dendrite input  
999 drawn from a right skewed normal distribution (skewness = 5,  $\sigma$  = 250 ms) centered 120 ms  
1000 after the saccade. Spiking statistics after error saccades were simulated by distal apical inputs  
1001 with the same probability distribution as in correct trials plus a basal input at 120 ms with the  
1002 same probability distribution as in correct trials sufficient to yield 5 pre-synaptic spikes and a  
1003 second distal apical input drawn from a right skewed normal distribution (skewness = 5,  $\sigma$  =  
1004 250 ms) centered 280 ms after the saccade. **D.** Simulated values were not different from  
1005 observed amplitude (correct trials,  $p$  = 0.4841; error,  $p$  = 0.4188), peak latency (correct,  $p$  =  
1006 0.3783; error,  $p$  = 1.0000), and peak half width (correct,  $p$  = 0.1553; error,  $p$  = 0.3669). **E.**  
1007 Simulated ISI produced the observed shorter ISI during error trials.

1008

1009 **Fig. 4:** EEG and LFP  $\theta$  power. Top row illustrates average ERP obtained from electrode FpFz  
1010 aligned on saccade on correct (left) and error (middle) trials with the resulting difference wave  
1011 (right). The spike potential associated with saccade production is evident in the correct and error  
1012 plots. The difference wave highlights the ERN followed by the Pe components. The next rows  
1013 plot observed (middle) and simulated (bottom) average  $\theta$  power across sessions through time  
1014 across the cortical layers on correct and error trials with the time-depth difference. Colormap  
1015 plots power modulation relative to the mean power during 200 ms before target presentation  
1016 ( $\mu\text{V}^2$ ) for observed and percentage of observed power. Time of peak polarization of ERN (dash)  
1017 and of Pe (dot-dash) are indicated. Statistically significant regions are outlined in the difference  
1018 plot.

1019

1020 **Fig. 5:** Observed (top) and simulated (bottom) average LFP and CSD. Single-trial simulated  
1021 LFPs were evoked by the activity of 625 L3 and 1,000 L5 error PCs located in a cylindrical  
1022 cortical column of 3 mm diameter. Neither observed nor simulated CSD had simple bipolar  
1023 structure, but the simulated CSD did not replicate the observed CSD.

1024

1025 **Fig. 6:** Intrinsic rhythmicity of 100 simulated L3 (A) and L5 (B) error neurons with randomized  
1026 distributions of AMPA (cyan) and NMDA (pink) synapses (left) activated randomly according to  
1027 Poisson processes (L3: basal mean = 2; apical mean = 1; L5: basal mean = 5, oblique mean =  
1028 4, apical mean = 1) without (left) and with (right) a synchronized input at time zero. The mean  
1029 power spectra ( $\pm 1.96 * SD$ ) of somatic (salmon) and dendritic (light blue) membrane potentials  
1030 (1<sup>st</sup> row) illustrate consistency of simulated neurons and pronounced peak in  $\theta$  power in L5 but  
1031 not L3 PCs.  $\theta$  phase of the dendritic (2<sup>nd</sup> row) and somatic (3<sup>rd</sup> row) membrane potentials  
1032 illustrate phase resetting of dendritic and soma membrane potentials of L5 neurons but only the  
1033 dendritic potentials of L3 neurons. To quantify the laminar structure of  $\theta$  power, the somas of the  
1034 simulated neurons were randomly distributed within a cylindrical cortical column of 3 mm  
1035 diameter with random depths within their associated cortical layers (L3 700-1100  $\mu\text{m}$  below the  
1036 pia matter; L5 1125-1750  $\mu\text{m}$ ). The laminar distribution of LFP  $\theta$  power (bottom row)  
1037 demonstrates elevated  $\theta$  power derived only from L5 PCs synchronized on the phase resetting.

1038

1039 **Fig. 7:** Multipole moments derived from observed (left) and simulated (right) CSD. **A.** Left –  
1040 Volume conductor model of the monkey's head (BME) with surfaces color-coded and electrodes  
1041 positions in yellow. Surfaces for constructing the BEM model of the monkey's head were  
1042 obtained from the NIMH Macaque Template version 2.0 (Jung et al. 2021). right – Location of  
1043 the SEF dipoles used in the EEG forward model. **B-C.** The time course of the monopole ( $m_z$ ,

1044 top), dipole ( $d_z$ , middle), and quadrupole ( $q_z$ , bottom) moments are plotted for correct (thin  
1045 black) and error (thick dotted) trials and their difference (magenta). Time of peak polarization of  
1046 ERN (dash) and of Pe (dot-dash) are indicated. The unbalanced current observed across  
1047 depths creates the monopole moment. The simulated dipolar and quadrupolar moments were 4  
1048 orders of magnitude weaker than the observed. Scaling up multipoles by increasing the density  
1049 of error PCs was not enough to reproduce the temporal profiles of these LFP and scalp  
1050 potentials.

1051

1052 **Fig. 8:** Contributions of SEF to the ERN and Pe. **A.** Cranial EEG during correct (thin solid) and  
1053 error (thick dotted) trials with their difference (magenta) illustrating the ERN and Pe  
1054 components. **B.** Comparison of the difference waves of the observed EEG (black, left axis) with  
1055 the predicted EEG monopolar (top), dipolar (middle), and quadrupolar (bottom) components  
1056 (red, right axis), respectively. The predicted EEG dipolar component explained ERN features,  
1057 and the quadrupolar component reproduced those for the Pe. The presence of a monopole  
1058 might indicate a more extended and diffuse neuronal activation pattern in SEF. **C.** Comparison  
1059 of EEG observed (black) and predicted (red) from the multipolar moments derived from the CSD  
1060 in SEF for correct (top) and error (middle) trials and their difference (bottom). The amplitude of  
1061 the EEG signals was normalized by the maximum absolute EEG amplitude across trial types for  
1062 Eu EEG and Eu CSD EEG separately. **D.** Variation of peak polarization of predicted ERN (left)  
1063 and Pe (right) as a function of the diameter of the cortical column used in the CSD calculation.  
1064 Linear regressions illustrate the significant variation, which was stronger for the Pe than the  
1065 ERN.

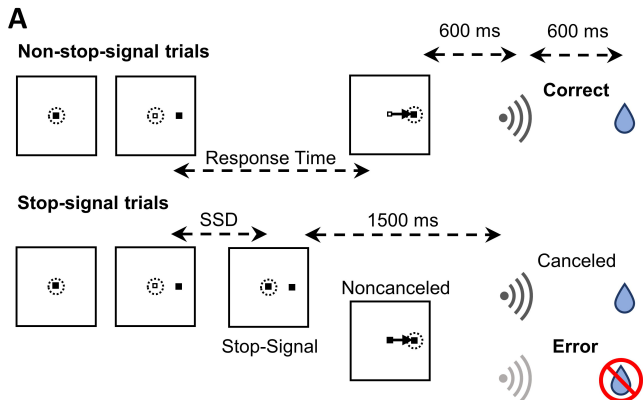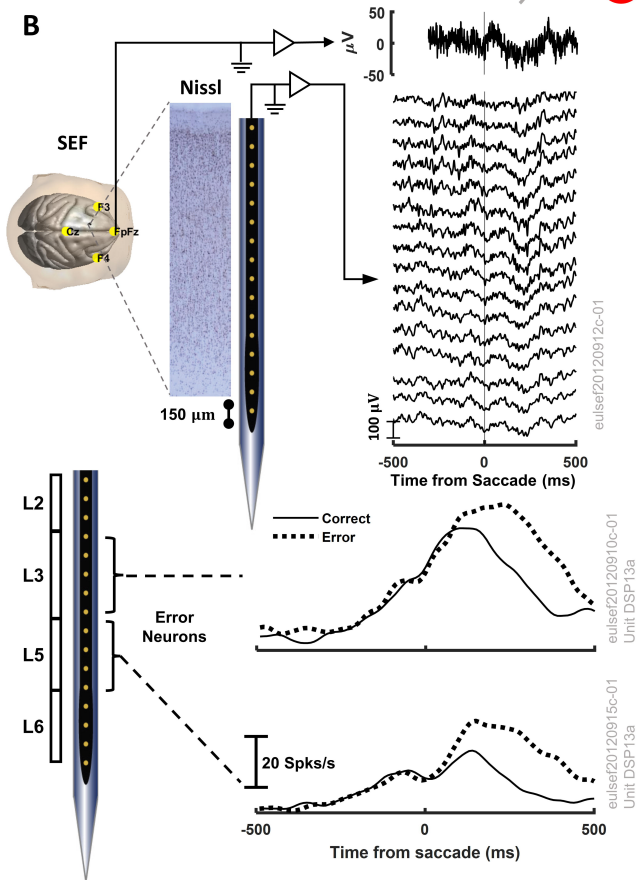

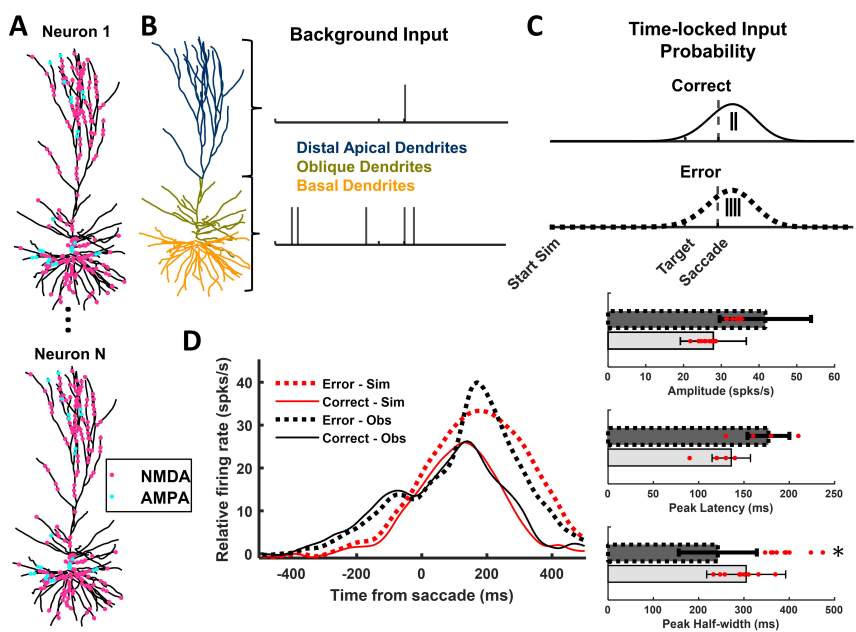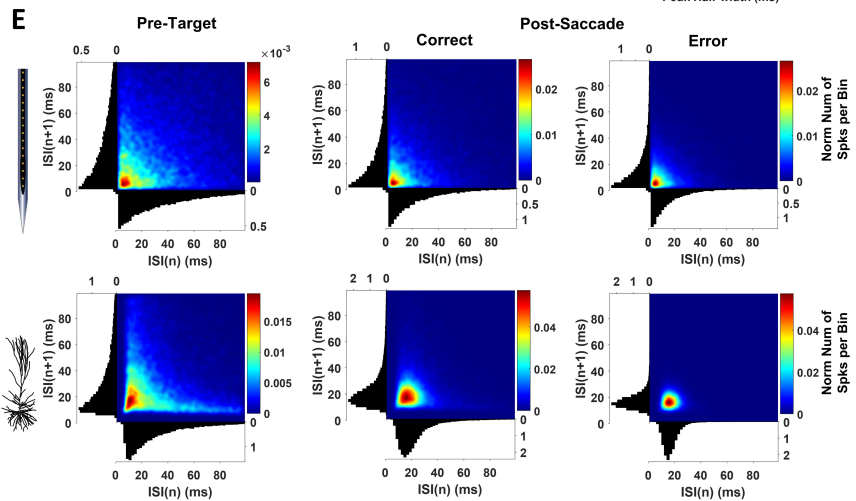



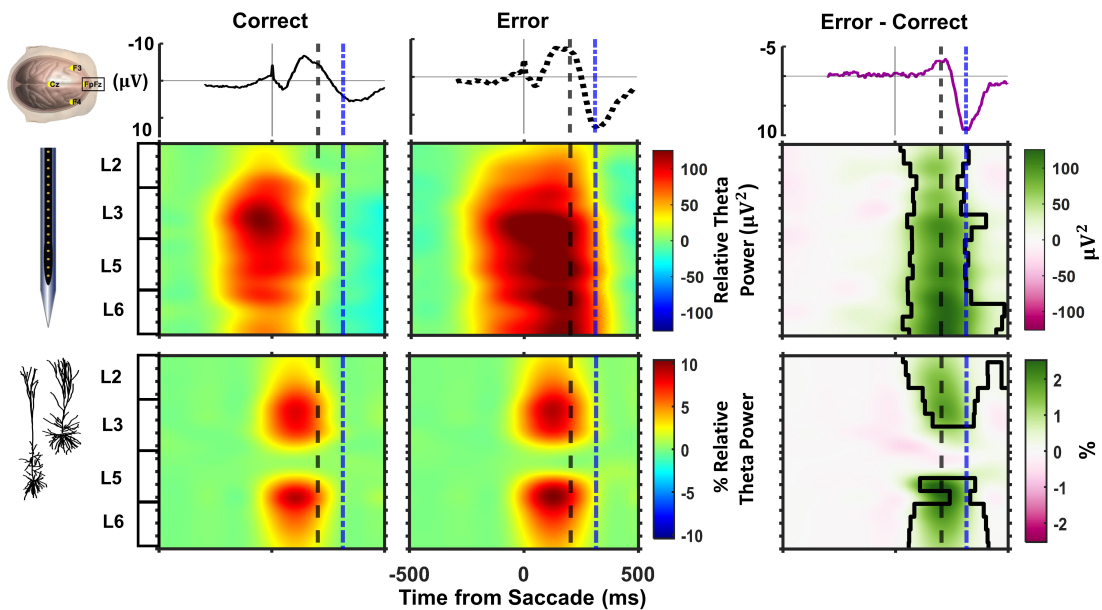

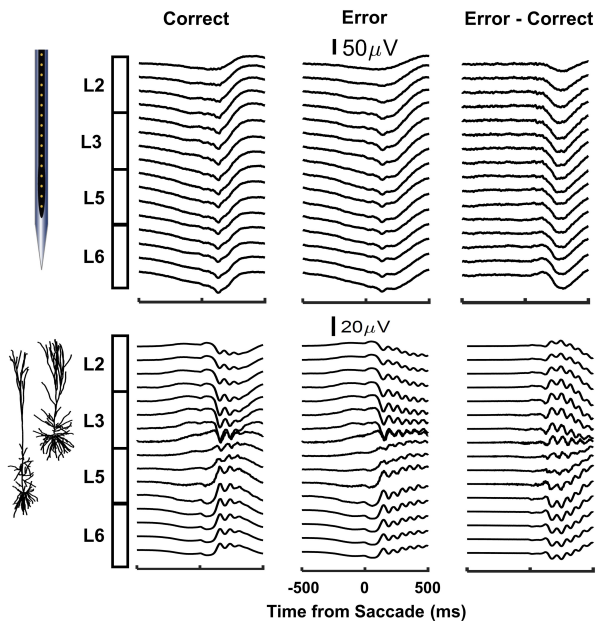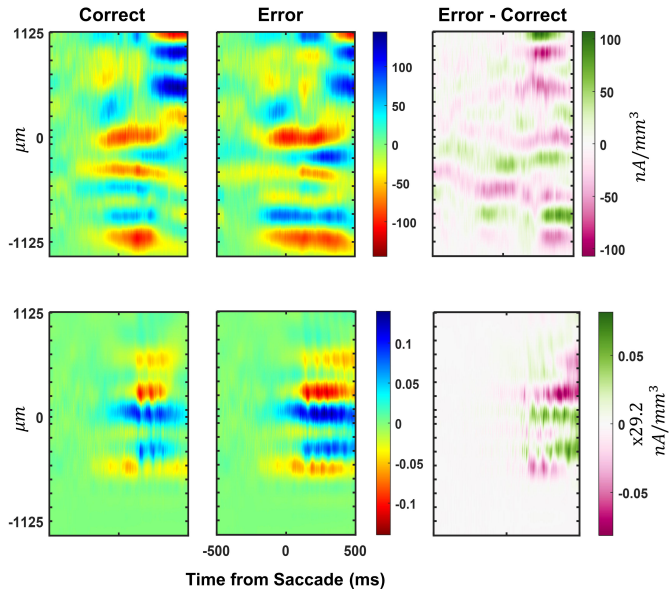



### No Synchronized Stimulus

### Synchronized Stimulus

**A**
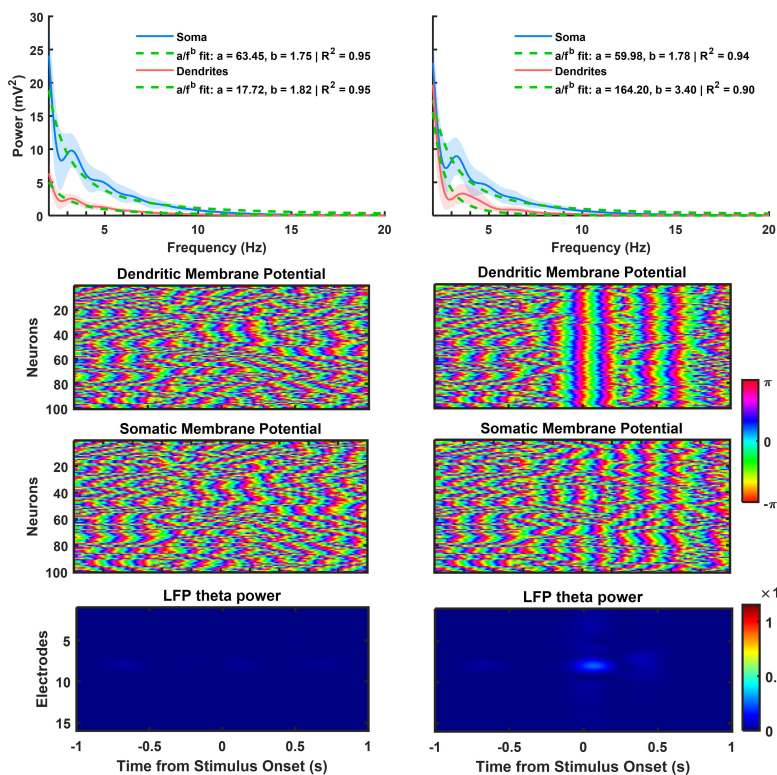
**B**
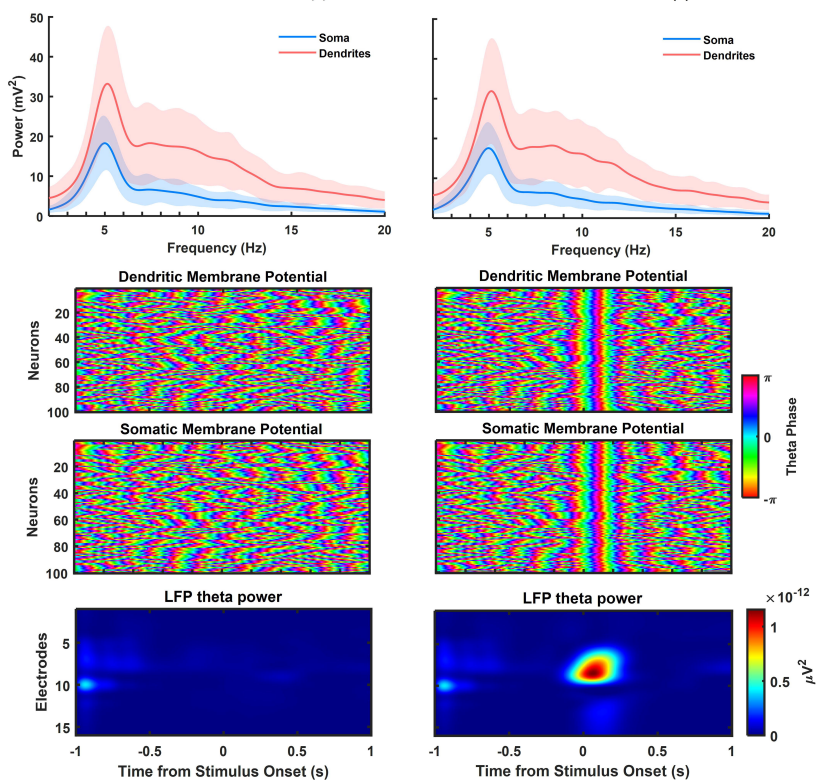

**A****BEM**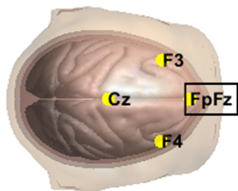**Dipoles SEF**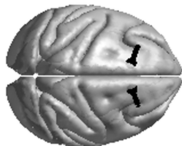**B****CSD multipole moments**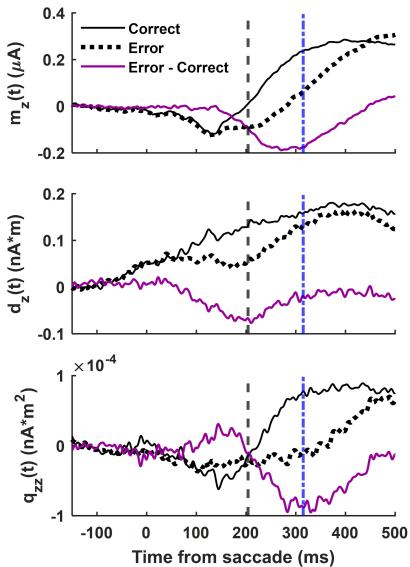**C****Simulated CSD multipole moments**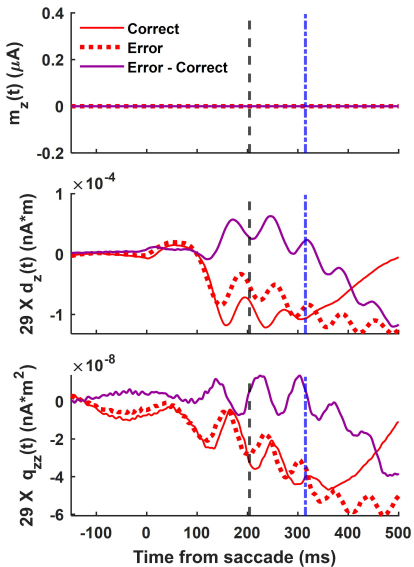

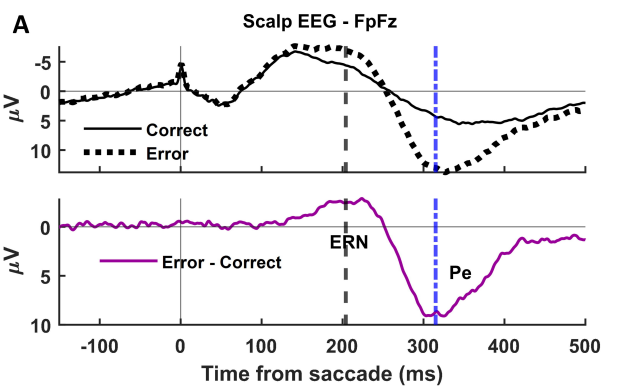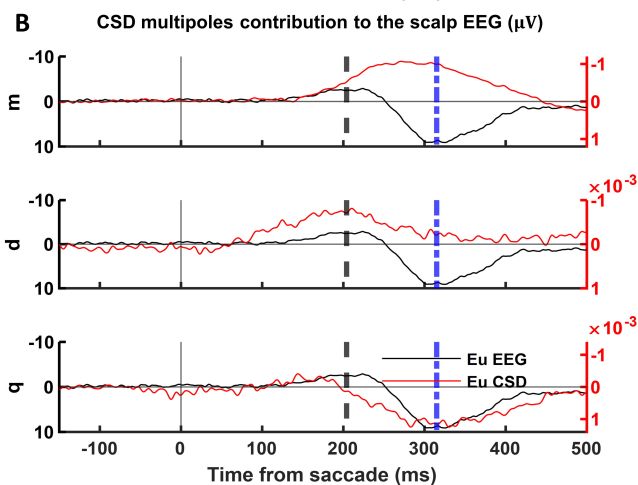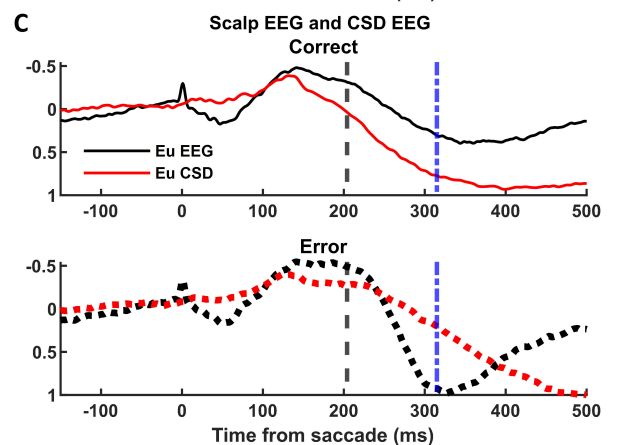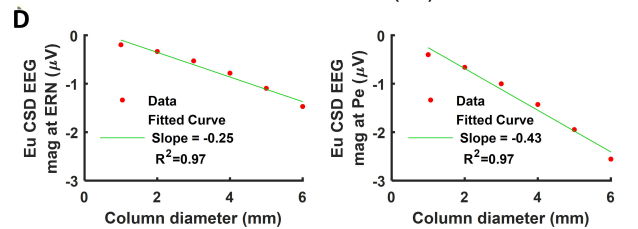

Source: https://www.biorxiv.org/content/10.1101/2023.06.27.546752.full.pdf
